1 **TITLE PAGE**

2 **Title:** Non-permissive human conventional CD1c<sup>+</sup> dendritic cells enable *trans*-infection of  
3 human primary renal tubular epithelial cells and protect BK polyomavirus from neutralization

4  
5 Mathieu Sikorski<sup>1</sup>, Flora Coulon<sup>1</sup>, Cécile Peltier<sup>1</sup>, Cécile Braudeau<sup>1,2</sup>, Alexandra Garcia<sup>1</sup>, Matthieu  
6 Giraud<sup>1</sup>, Karine Renaudin<sup>1,3</sup>, Christine Kandel-Aznar<sup>3</sup>, Steven Nedellec<sup>4</sup>, Philippe Hulin<sup>4</sup>, Julien  
7 Branchereau<sup>1,5,6</sup>, Joëlle Véziers<sup>7,8</sup>, Pauline Gaboriaud<sup>9</sup>, Antoine Touzé<sup>9</sup>, Julien Burlaud-Gaillard<sup>10</sup>, Régis  
8 Josien<sup>1,2</sup>, Dorian McIlroy<sup>1</sup>, Céline Bressollette-Bodin<sup>1,11</sup>, Franck Halary<sup>1\*</sup>

9  
10 <sup>1</sup> Nantes Université, Inserm, CHU Nantes, Center for Research in Transplantation and Immunology  
11 UMR1064, ITUN, Nantes, France

12 <sup>2</sup> CHU Nantes, Laboratoire d'Immunologie, CIMNA, Nantes, France

13 <sup>3</sup> CHU Nantes, Service d'Anatomie et Cytologie Pathologiques, Nantes, France

14 <sup>4</sup> MicroPicell imaging facility, Structure Fédérative de Recherche Santé François Bonamy - FED  
15 4203/UMS Inserm 016/CNRS 3556, Nantes, France

16 <sup>5</sup> CHU Nantes, Service d'urologie, France

17 <sup>6</sup> CHU Nantes, Service de transplantations rénales, France

18 <sup>7</sup> Plate-forme SC3M, Structure Fédérative de Recherche Santé François Bonamy - FED 4203/UMS  
19 Inserm 016/CNRS 3556, Nantes, France

20 <sup>8</sup> INSERM, UMRS 1229, RMeS, UFR Odontologie, CHU Nantes, Nantes, France

21 <sup>9</sup> Infectiologie et Santé Publique, UMR INRAE 1282, UFR de Sciences Pharmaceutiques, Université de  
22 Tours, France

23 <sup>10</sup> Département des Microscopies, Plateforme IBiSA de Microscopie Electronique, Université de Tours,  
24 France

25 <sup>11</sup> CHU Nantes, Laboratoire de virologie, Nantes, France

26

27 \*Corresponding author

28 Email: [franck.halary@univ-nantes.fr](mailto:franck.halary@univ-nantes.fr)

29

30 **Running title:** Non permissive human CD1c<sup>+</sup> DC enable BKPyV transmission

31 **Abstract word count: 182**

32 **Text word count (including Methods, excluding Abstract and Figure legends): 4514**

## 33 **Abstract**

34 The BK polyomavirus (BKPyV) is a ubiquitous human virus that persists in the renourinary  
35 epithelium. Immunosuppression can lead to BKPyV reactivation in the first year post-  
36 transplantation in kidney (KTR) and hematopoietic stem cell transplant recipients. In KTR,  
37 persistent DNAemia has been correlated to the occurrence of polyomavirus-associated  
38 nephropathy (PVAN) that can lead to graft loss if not properly controlled. Based on recent  
39 observations that conventional dendritic cells (cDC) specifically infiltrate PVAN lesions, we  
40 hypothesized that those cells could play a role in BKPyV infection. We first demonstrated that  
41 monocyte-derived DC (MDDC), an *in vitro* model for mDC, captured BKPyV particles through  
42 an unconventional GRAF-1 endocytic pathway. Neither BKPyV particles nor BKPyV-infected  
43 cells were shown to activate MDDC. Endocytosed virions were efficiently transmitted to  
44 permissive cells and shown to be protected from the antibody-mediated neutralization. Finally,  
45 we demonstrated that freshly isolated CD1c<sup>+</sup> mDC from the blood and kidney parenchyma  
46 behaved similarly to MDDC thus extending our results to cells of clinical relevance. This study  
47 sheds light on a potential unprecedented CD1c<sup>+</sup> mDC involvement in the BKPyV infection as  
48 a promoter of viral spreading.

49

## 50 **Introduction**

51 The BK polyomavirus (BKPyV) is a small non-enveloped DNA virus. Its icosahedral capsid is  
52 mainly composed of the major capsid protein VP1(1-3). Its prevalence in the worldwide  
53 population ranges from 80 to 90%(4, 5). Asymptomatic primary infection mostly occurs during  
54 childhood(6, 7) followed by a persistent infection in the renourinary epithelium(8). Evidence  
55 of BKPyV reactivation was mainly reported in kidney and hematopoietic stem cell allografts(9-  
56 12) first marked by viral shedding in urine possibly progressing to BKPyV-DNAemia.

57 Persistent BKPyV-DNAemia above  $10^4$  DNA copies/ml has been correlated to PVAN (overall  
58 1-5% of KTR)(13-15). To date, BKPyV remains a significant cause of kidney failure(11, 16).

59 Over the last ten years, anti-BKPyV cellular and humoral immune responses have been  
60 investigated demonstrating a prominent role of both specific CD4+ and CD8+ cytotoxic T  
61 lymphocytes (CTL), mainly recognizing the large T antigen (LTA<sub>g</sub>)- and VP1-derived peptides  
62 associated with various HLA molecules(17-20). Although anti-BKPyV responses are likely to  
63 be protective enough in healthy individuals, only ten percent of those shed virions in urine  
64 suggesting a limited impact of escape mechanisms(5). DC are known to orchestrate anti-viral  
65 immune responses mainly through their ability to cross-present viral antigens, thus efficiently  
66 priming or activating naïve or memory specific T cells respectively(21). To date, anti-  
67 polyomavirus (PyV) CTL responses in mice and humans were analyzed on autologous PBMC  
68 or DC stimulation using viral peptide pools thus bypassing the requirement for antigen  
69 processing, including endocytosis, and presentation by HLA class I molecules(18, 21, 22). Only  
70 few studies addressed the ability of PyV to bind to, promote maturation or infect DC. In mice,  
71 Drake and colleagues showed that splenic DC are activated following infection by a murine  
72 PyV (MuPyV) strain thus allowing them to prime a CTL response(22). Using another  
73 experimental setup, Lenz et al demonstrated that although HPV16, a carcinogenic  
74 papillomavirus, and bovine PyV virus-like particles (VLP) enabled bone marrow-derived DC  
75 maturation, BKPyV or JCPyV VLP did not(23). More recently, hamster PyV (HaPyV)- and  
76 Trichodysplasia Spinulosa-associated PyV-derived VLP were shown to moderately activate  
77 murine splenocytes(24). Similarly, SV40 was shown to infect and activate MDDC from rhesus  
78 macaques(25). Human MDDC were shown to support  $\beta$ -propiolactone-inactivated BKPyV-  
79 derived antigen presentation while remaining unresponsive to native BK- and JCPyV  
80 particles(26) possibly due to distinct viral antigen processing induced by inactivation(27).

81 Gedvilaite and colleagues also reported that human MDDC were responsive to MuPyV and

82 HaPyV VLP(26). Mostly, DC, although limited to *in vitro* generated cells, seemed to be  
83 unresponsive to BK- or JC PyV direct exposure and poorly responsive to BKPyV-derived  
84 antigens in KTR and immunocompetent individuals, as recently proposed by Kaur et al(28).  
85 The mechanisms behind such DC unresponsiveness remain to be explored regardless of the  
86 presence of immunosuppressive drugs.

87 In the healthy kidney, cDC, including the CD1c<sup>+</sup> DC subset, are located within the  
88 interstitium(29), close to the renal proximal tubular epithelial cells (hRPTEC), a host cell for  
89 BKPyV(30). HRPTEC were shown to negatively regulate cDC activation subsequently leading  
90 to the retention of cDC in renal tissues as immature cells(31-33) putatively decreasing antigen  
91 presentation by DC. Early stage PVAN is marked by a CD1c<sup>+</sup> cDC infiltrate(34) and mild  
92 inflammation(30, 35, 36). Whether cDC play a role in the pathophysiology of the BKPyV  
93 infection apart from their ability to trigger and sustain specific immune responses is still  
94 unclear.

95 Here, we demonstrate for the first time that myeloid DC, ie MDDC and freshly isolated CD1c<sup>+</sup>  
96 cDC from the blood and the kidney of healthy donors, but not plasmacytoid DC were capable  
97 of capturing BKPyV particles through the CLIC/GEEC endocytic pathway and transmitting  
98 them to hRPTEC without getting activated or infected. We also showed that endocytosed  
99 BKPyV particles were protected from antibody-mediated neutralization offering to cDC subsets  
100 the possibility to participate in BKPyV spreading in the kidney at least in early steps of the  
101 reactivation.

102

## 103 **Methods**

### 104 **Ethic statements**

105 Biopsies from healthy parts of primitive renal carcinoma patients and blood samples from KTR  
106 were collected according to institutional guidelines (CPP Ouest authorization, 11/08/2011) and  
107 under patients' informed consent. All samples are conserved in the ITUN bio collection  
108 declared at the french Ministère de l'Enseignement Supérieur et de la Recherche under the  
109 reference DC-2011-1399 (09/05/2011).

110

### 111 **Cell isolation and culture**

112 Elutriated blood monocytes were obtained from healthy volunteers (DTC cell-sorting facility,  
113 CHU Nantes, France) and differentiated into monocyte derived-dendritic cells (MDDC) as  
114 described by Sallusto et al(37). Human myeloid CD1c+ DC were isolated from blood and  
115 kidney by positive immuno-magnetic selection using anti-CD1c/BDCA-1 microbeads  
116 according to the manufacturer's instructions (Miltenyi Biotec, Bergisch Gladbach, Germany)  
117 or on a FACS ARIA (BD Biosciences, Franklin Lakes, NJ), respectively. CD1c+ DC were  
118 recovered from renal cell suspensions of enzymatically digested macroscopically healthy parts  
119 of tumor-bearing kidneys (10-15g). Cell purity typically yielded more than 95%. HRPTEC  
120 (Sciencell Research Laboratories, Carlsbad, CA) were cultured in complete EpiCM medium  
121 (Sciencell Research Laboratories). LNCaP cells (Caliper LifeSciences, Hopkinton, MA) and  
122 HEK 293 TT cells (NCI, Frederick, MD) were cultured in RPMI 1640 or DMEM media  
123 respectively, both complemented with 2mM L-glutamine and 10% FBS.

124

### 125 **Virus and virus-like particle preparation**

126 The BKPyV Dunlop strain was a kind gift by Dr Christine H Rinaldo (UiT, Norway). The gIa,  
127 gIb2 and gIVb1 VP1 expression vectors were kindly provided by Dr Christopher Buck (NCI,

128 USA)(38). Preparation and titration of the Dunlop strain were performed as described  
129 elsewhere(39). Virus-like particles (VLP) were purified on an iodixanol gradient(40). VLP  
130 physical titers were determined on a qNano device using NP100 nanopores (detection range  
131 from 50 to 330 nm) and CPC70 calibration particles (Izon Science Ltd, Oxford, UK). Both viral  
132 particles and VLP were labelled with Alexa Fluor®647 protein labelling kit according to  
133 manufacturer's instructions (Molecular Probes, Eugene, OR). Modified-vaccinia Ankara virus  
134 (MVA) was kindly provided by Pr Don Diamon (CoH, Los Angeles, CA).

135

### 136 ***Cis* and *Trans*-infection assays**

137 *Cis*- and *trans*-infection experiments were performed as described previously(41, 42). DC and  
138 hRPTEC were infected with BKPyV at MOI 0.1 (Dunlop strain). For trans-infection, BKPyV-  
139 loaded DC were washed in PBS after two hours at 37°C then put in contact with a subconfluent  
140 hRPTEC monolayer. Controls were prepared similarly. After three to seven days post-infection  
141 (dpi), LTA<sub>g</sub> staining was performed to evaluate infection rates as described before (Moriyama  
142 and Sorokin, 2009) and imaged on an Axiovert A1 epifluorescence microscope (Carl Zeiss  
143 Microscopy GmbH, Germany) or on a Cellomics ArrayScan VTI HCS Reader (Thermo  
144 Scientific) for quantification. 25-50 fields, containing 5000-10000 cells were acquired for each  
145 well using HCS Studio Cellomics Scan Version 6.5.0 software at various time points pi. VP1  
146 expression was assessed by western blot (ab53977; Abcam) against β-actin (clone C4; Santa  
147 Cruz Biotechnology Inc., Dallas, Texas).

148

### 149 **Quantitative RT-PCR analyses**

150 Total RNA was isolated using the TRIzol reagent (Invitrogen) according to the manufacturers'  
151 instructions. Reverse transcription was performed using M-MLV Reverse Transcriptase and  
152 random primers following manufacturer's instructions (Invitrogen, USA). Quantitative PCR on  
153 reverse transcribed mRNA was performed using Mastermix (Applied Biosystems) or Premix  
154 ExTaq 2x (Takara) reagents and the StepOne Plus (Applied Biosystems) or Rotor-Gene  
155 (Qiagen) devices. Primers and probe used to detect *LTA*g mRNA were the following: AgT1 5'-  
156 ACTCCCACTCTTCTGTTCCATAGG-3', AgT2 5'-TCATCAGCCTGATTTTGG AACCT-3'  
157 and AGTS 5'-FAM-TTGGCACCTCTGAGCTAC-BHQ1-3'. Expression levels were  
158 normalized to GAPDH using the 2- $\Delta\Delta$  cycle threshold method.

159

#### 160 **Gene expression profiling and datasets deposition**

161 BKPyV-mediated cell reprogramming was analysed after 24 hours by 3'digital gene expression  
162 (DGE) RNAseq according to Kilens et al.(43). DGE profiles were generated by counting for  
163 each sample the number of unique UMIs associated with each RefSeq genes. DESeq 2 was used  
164 to normalize expression with the DESeq function. The analysis design used to perform  
165 differential expression with DESeq2 between the infected vs non-infected conditions took into  
166 account the individual DC donors as a confounding variable. Data supporting our results are  
167 openly available in the GEO repository under the following ID: GSE154810.

168

#### 169 **Flow cytometry analyses**

170 Titrated Alexa Fluor®647 labelled-VLP were used to stain cDC, LNCaP and HEK 293 TT cells  
171 at the indicated concentration. VLP attachment was detected by flow cytometry gated on DAPI  
172 negative cells. To assess DC activation, cells were incubated for 24 hours with 10<sup>3</sup> VLP/cell,

173  $10^3$  BKPyV particles/cell or with 100ng/mL LPS and 1 $\mu$ g/mL R848 (Invivogen, San Diego,  
174 CA). Antibodies to CD40 (clone 5C3; BD Biosciences), CD80 (clone L307, BD Biosciences),  
175 CD83 (clone HB15e, BD Biosciences), CD86 (clone IT2.2, BD Biosciences), CCR6 (clone  
176 11A9, BD Biosciences), CCR7 (clone 3D12, BD Biosciences) and HLA-DR (clone G46-6, BD  
177 Biosciences) were used to monitor DC maturation. Whole blood staining was performed on  
178 500 $\mu$ l blood samples from healthy donors with or without Fc fragment receptor blockers  
179 (Miltenyi Biotec). Whole blood staining was done with Alexa Fluor®647 labelled-VLP  
180 (2.5 $\mu$ g/ml) and cell subsets were discriminated using the following antibody panel : CD45  
181 (Clone J33; Beckman Coulter, Brea, CA), CD11c (Clone BU15; Beckman Coulter), HLA-DR  
182 (Clone L243; BD Biosciences), CD123 (Clone 9F5; BD Biosciences) and Lineage (Lin 1; BD  
183 Biosciences). FACS analyses were mainly performed on a LSR II flow cytometer (BD  
184 Biosciences).

185

## 186 **Fluorescence microscopy**

187 MDDC were distinguished from hRPTEC by DC-SIGN staining (clone DCN46; BD  
188 Biosciences) when required. High-resolution confocal microscopy by structured illumination  
189 was performed to assess BKPyV entry into MDDC. Cells were incubated with determined VLP  
190 concentrations for one hour at 37°C in culture medium, washed and fixed with 3.7% PFA (PFA;  
191 Electron Microscopy Sciences, Hatfield, PA). Plasma membrane (PM) was stained with  
192 5 $\mu$ g/mL Alexa Fluor®488-conjugated WGA (Thermo Fisher Scientific). Images were acquired  
193 on a Nikon N-SIM microscope with a dedicated oil immersion objective (x100, NA 1.49 Plan  
194 Apo). Three dimensional optical sectioning was done respecting Nyquist sampling rate (15  
195 structure illuminations per plane, per channel), and super resolution image reconstruction was  
196 performed using Nikon Imaging Software algorithms. BKPyV particle colocalization with



197 CTxB, GRAF-1 and EEA-1 markers was performed as described above with or w/o 2µg/mL  
198 Alexa Fluor®555 conjugated CTxB (Thermo Fisher Scientific), and with anti-GRAF1  
199 (4µg/mL; Novus Biological, Littleton, CO) or anti-EEA1 antibody (BD Biosciences) antibodies  
200 in 0.1% BSA PBS O/N at 4°C. Nuclei were counterstained with DAPI. Cells were mounted in  
201 ProLong™ mounting medium (Thermo Fisher Scientific) and observed on a LSM Nikon  
202 A1RSi microscope (Nikon, Tokyo, Japan) at x60 (NA 1.4). 3D reconstruction was done using  
203 the Imaris software (Bitplane, Zurich, Switzerland).

204

### 205 **Transmission electron microscopy**

206 MDDC were prepared for transmission electron microscopy as described elsewhere(42).  
207 Ultrathin sections were observed on a JEM 1010 microscope (Jeol Europe SAS, Croissy Sur  
208 Seine, France). TEM images of BKPyV particle preparations in negative contrast were obtained  
209 as described previously(44, 45).

210

### 211 **ELISA**

212 Supernatants from various MDDC cultures were harvested at indicated times and frozen at -  
213 80°C until being analyzed. IL-10 and IL-12p70 were quantified in those culture supernatants  
214 by ELISA with BD OptEIA™ human IL-10 and IL-12p70 sets following the manufacturer's  
215 instructions (BD Bioscience).

216

### 217 **Statistics**

218 Statistical analyses were performed with the PRISM software (GraphPad Software Inc., version  
219 5.04, La Jolla, CA). Almost exclusively one-way ANOVA with multiple comparison tests were  
220 performed to assess significance in this study. Exceptionally, correlation and linear regression  
221 studies, Mann-Whitney or Friedman tests were also applied to some data sets. *P*-values lower  
222 than 0.05 were considered significant.

223

## 224 **Results**

### 225 **Human monocyte-derived dendritic cells bind BKPyV particles in a dose- and sialic acid-** 226 **dependent manner**

227 First, we assessed whether MDCC could bind BKPyV particles using fluorescent-labelled  
228 genotype Ib2 (gIb2) BKPyV VLP. VLP integrity was checked by negative contrast TEM  
229 (Figure 1A). GIb2 VLP binding was then tested with two BKPyV permissive cell types, namely  
230 hRPTEC and HEK293TT but also to MDCC and LNCaP, a BKPyV non-permissive prostatic  
231 cancer cell line(46) at various VLP/cell ratios. MDCC effectively bound gIb2 VLP in a dose-  
232 dependent manner but to a lesser extent compared to hRPTEC or HEK293TT (Figure 1B), and  
233 as expected BKPyV particles were unable to attach to LNCaP cells. MDCC were also shown  
234 to bind gIa infectious particles (Dunlop strain; (47)) and VLP at comparable levels (Figure 1C).  
235 We further demonstrated that genotypes Ia, Ib2 and IVb1 VLP had similar binding properties  
236 to MDCC (Figure 1D). Sialic acids decorating *b*-series gangliosides are known as crucial  
237 components for BKPyV infection of hRPTEC and HEK293TT(46). Then, we demonstrated that  
238 when MDCC are treated with an appropriate neuraminidase, an enzyme known to specifically  
239 remove sialic acid moieties from the PM, gIa, gIb2 and gIVb1 VLP binding was strongly  
240 impaired (Figure 1E). Altogether, these results clearly established that MDCC could bind

241 BKPyV from the most frequent genotypes in Europe and Asia in a dose and sialic acid-  
242 dependent manner.

243

244 **BKPyV particles are endocytosed in pleiomorphous tubular and macropinosome-like**  
245 **endosomes in MDDC**

246 Immature MDDC exhibit high endocytic properties for soluble and particulate antigens (37).  
247 Therefore, we hypothesized that BKPyV could be endocytosed following attachment to sialic  
248 acid residues on PM. High-resolution confocal imaging showed that fluorescent spots  
249 representing VLP or virions were found in cytoplasmic structures (Figures 2A and 2B),  
250 confirming that MDDC endocytosed BKPyV following surface attachment. VLP were either  
251 located in round-shaped or pleiomorphous tubular structures (Figures 2A and 2C). This was  
252 confirmed by 3D cell reconstruction (Figure 2D). Then, we performed TEM imaging and  
253 confirmed that VLP and virions were mostly internalized after 30 minutes. Indeed VLP were  
254 mainly endocytosed into tubular vesicles (40-60nm width) and to a much lower extent in large  
255 round-shaped uncoated endosomes (up to approximately 1µm in diameter) by MDDC (Figures  
256 3A, 3B, 3C, 3D3E and 3G). Moreover, these BKPyV-containing tubular vesicles were shown  
257 to originate from PM invaginations (Figures 3D and 3E). Some of these vesicles closely  
258 resembled sorting endosomes (Figure 3C). Higher magnifications micrographs confirmed that  
259 BKPyV virions behaved similarly to VLP (Figure 3F) did not reveal PM curvature upon viral  
260 attachment as previously reported for SV40 (Figure 3G; (48)). We concluded that BKPyV was  
261 mainly endocytosed into tubular vesicles evoking an uncommon endocytic pathway for viral  
262 particles in MDDC.

263

264 **BKPyV colocalizes with GRAF-1+ and cholera toxin B+ compartments in MDDC**

265 To characterize BKPyV containing vesicles in MDDC we used high-resolution confocal  
266 microscopy to identify markers co-localizing with BKPyV in MDDC. Early Endosome  
267 Antigen-1 (EEA-1), a marker of early endosomes and macropinosomes, was associated with  
268 BKPyV in structures with size ranging from 100nm, the detection limit with this technique, to  
269 roughly 1 $\mu$ m in diameter (Figures 4A and 4B). The clathrin-independent carriers (CLIC) or  
270 GPI-anchored protein-enriched compartments (GEEC) endocytic pathway(49, 50) known to  
271 form tubular vesicles has been recently associated with the protein GTPase Regulator  
272 Associated with Focal Adhesion Kinase-1 (GRAF1) (51). BKPyV colocalized with GRAF-1 at  
273 the PM and in the cytosol (Figure 4C). Cholera toxin B subunit (CTxB) uses GRAF-1 vesicles  
274 to enter cells (51) and we observed a partial VLP/CTxB colocalization in MDDC (Figure 4D).  
275 Altogether, our results showed for the first time in MDDC a major BKPyV endocytosis into  
276 GRAF-1+ and CTxB+ compartments, two hallmarks of the CLIC/GEEC pathway.

277

### 278 **MDDC can transfer virions to renal epithelial cells but are refractory to BKPyV infection**

279 Next, we wondered whether BKPyV-pulsed MDDC, hereafter termed “BKPyV-infected  
280 MDDC”, could transfer the virus to a permissive cellular third party in *trans*. Here, we took  
281 advantage of a *trans*-infection assay previously set up in our laboratory(41, 52). It assesses the  
282 ability of a cell type to capture and transfer virions to permissive cells in its vicinity after  
283 removing excess unbound/non-internalized virions. LTA<sub>g</sub> expression was analyzed in these  
284 conditions at defined time points (Figure 5A). Infection of hRPTEC, termed *cis*-infection, was  
285 estimated between 10 to 18% in all experiments at seven days pi (Figure 5A). No LTA<sub>g</sub> was  
286 detected in BKPyV-infected MDDC suggesting that BKPyV infection is not initiated in MDDC  
287 (Figure 5A). To confirm these results with a more sensitive technique, we analyzed LTA<sub>g</sub>  
288 expression by RT-qPCR in a similar experimental design. Quantitative results are shown in

289 Figure 5B. As expected, no LTA<sub>g</sub> mRNA was detected in BKPyV-infected MDDC whereas  
290 the *cis*-infection of hRPTEC or the *trans*-infection conditions displayed high amounts of LTA<sub>g</sub>  
291 mRNA. These results were confirmed by assessing the expression of the major capsid protein  
292 VP1, a late infection marker (Figure 5C). To confirm the CLIC/GEEC pathway involvement in  
293 the BKPyV *trans*-infection process, we finally tested the effect of the ciliobrevin D (CBD), a  
294 cytoplasmic dynein inhibitor(53), on MDDC during virus loading. Noticeably, a 50μM dose of  
295 CBD significantly decreased *trans*-infection with no measurable MDDC cytotoxicity (Figure  
296 5D). Altogether, these results demonstrated that MDDC, while non-permissive to BKPyV,  
297 capture BKPyV virions and can transfer them to permissive cells like hRPTEC in a dynein-  
298 dependent manner.

299

### 300 **Human MDDC are neither activated by BKPyV particles nor BKPyV-infected hRPTEC**

301 MDDC can sense danger signals through various pattern-recognition receptors (PRR) including  
302 toll-like receptors (TLR) thus leading to MDDC maturation(54, 55). Conflicting results on DC  
303 activation by BKPyV in the literature prompted us to ask whether BKPyV attachment would  
304 lead to MDDC activation. Twenty-four hour MDDC cultures with VLP or virions were  
305 analyzed by flow cytometry to assess the acquisition or up-regulation of known DC maturation  
306 markers. A maturation enabling dose of LPS and R848(56), two TLR agonists, and a Modified  
307 Vaccinia Ankara (MVA) attenuated poxvirus known to activate MDDC were added as positive  
308 controls of maturation when necessary. First, expression of CD86, a sensitive and reliable  
309 marker of DC maturation (57), was assessed. Only exposure to TLR agonists or to the Modified  
310 Vaccinia Ankara attenuated poxvirus known to activate MDDC induced CD86 upregulation  
311 ((58-61); Figure 6A). Accordingly, no IL-12p70, a T helper type 1 cytokine, IL-10 or IL-8 were  
312 detected in MDDC culture supernatants cultivated with BKPyV (Figure 6B). Expression of the

313 CD80, CD83, CD40, CCR7 and HLA-DR on MDDC gave consistent results (Figure 6C). Then  
314 we hypothesized that MDDC could be activated not by BKPyV particles *per se* but by BKPyV-  
315 infected hRPTEC. hRPTEC infection was monitored by RT-qPCR for *LTA*g mRNA expression  
316 (data not shown). In that setting, MDDC CD86 expression did not vary upon cultivation with  
317 BKPyV-infected cells (Figure 6D). To exclude “under the radar” activation signals, we finally  
318 performed a digital RNA sequencing (DGEseq; REF) of BKPyV-infected MDDC compared to  
319 non-infected cells. In line with previous experiments, no difference was observed between  
320 BKPyV-infected and non-infected MDDC in terms of mRNA profile reprogramming at one dpi  
321 (Figure 6E). These results confirmed that MDDC were unresponsive to BKPyV and BKPyV-  
322 infected hRPTEC.

323

#### 324 **Internalized BKPyV is protected from neutralization**

325 Together with cellular immune responses, neutralizing anti-BKPyV antibodies (NAbs) are  
326 required to control infection or reactivation in KTR(17, 62-66) and healthy donors(67). Here  
327 we wondered whether BKPyV could be protected from neutralization when internalized by  
328 MDDC. To address this point, *trans*-infection was performed in the presence of neutralizing  
329 and control sera from BKPyV reactivating or non-activating KTR respectively. Neutralizing  
330 antibodies completely blocked hRPTEC *cis*-infection whereas the control serum had no effect  
331 (Figure 7). When virions were pre-incubated with NAbs prior to MDDC loading, a significant  
332 loss in *trans*-infection was observed compared to controls. As a conclusion, NAbs were  
333 ineffective when used after BKPyV loading of MDDC suggesting virions were protected from  
334 neutralization once internalized.

335

336 **Blood and kidney CD1c<sup>+</sup> cDC display similar BKPyV *trans*-infection abilities and non-**  
337 **permissiveness to MDDC**

338 MDDC were shown to be closely related to inflammatory DC in humans(68, 69) so to ensure  
339 our observations were not biased by the DC generation protocol, we first wondered whether  
340 cDC, the most abundant tissue and blood DC subset under non-inflammatory conditions, could  
341 behave like MDDC. First, VLP were incubated with whole blood of healthy volunteers and  
342 VLP staining was further analyzed by flow cytometry on both cDC (CD11c<sup>+</sup>) and plasmacytoid  
343 (pDC; CD123<sup>+</sup>) DC among HLA-DR<sup>+</sup> Lin<sup>-</sup> cells (Supplemental Figure 1). A significant  
344 proportion of cDC bound VLP whereas no binding was detected on pDC (Supplemental Figure  
345 1 and Figure 8A). Importantly, binding to cDC was not affected by Fc receptor blockade  
346 suggesting that VLP attachment did not depend on anti-VP1 antibodies in whole blood of  
347 healthy donors (Figure 8B). To avoid any interference due to the whole blood environment,  
348 CD1c<sup>+</sup> DC, representing the main myeloid DC subset in blood(70) and kidney(71) were sorted  
349 according to the gating strategy displayed in Supplemental Figure 2, incubated with VLP and  
350 analyzed by flow cytometry. Blood and kidney CD1c<sup>+</sup> cDC were clearly capable of binding  
351 VLP as well as virions in a dose-dependent manner (Figures 8C and 8D, respectively). Then,  
352 we showed that like MDDC, CD1c<sup>+</sup> cDC were unresponsive to BKPyV particles (Figure 8E).  
353 We finally demonstrated that sorted CD1c<sup>+</sup> cDC enabled BKPyV *trans*-infection to permissive  
354 cells while being resistant to infection themselves (Figure 8F). Taken together our results  
355 demonstrate that biologically relevant blood and renal CD1c<sup>+</sup> cDC behave similarly to MDDC  
356 with respect to BKPyV infection.

357

358 **Discussion**

359 In this study, cDC, either generated *in vitro* or isolated from human blood and kidney, were  
360 shown to support BKPyV attachment in a sialic acid-dependent manner and subsequent  
361 clathrin-independent endocytosis through two distinct pathways, the first involving GRAF-1+  
362 CLIC/GEEC and the second, minor pathway dependent on EEA1+ macropinocytic  
363 endocytosis. However, we did not provide evidence on potential spatio-temporal connections  
364 between both compartments. Upon contact, cDC were not activated by viral particles or  
365 BKPyV-infected cells. Moreover, we showed that MDDC and CD1c+ cDC were non-  
366 permissive to BKPyV infection. Internalized or membrane-bound BKPyV virions kept their  
367 ability to *trans*-infect permissive cells like hRPTEC and were also shown to be protected from  
368 neutralization by sera of BKPyV reactivating KTR.

369 We demonstrated that BKPyV interacts with human MDDC in a dose- and sialic acid-  
370 dependent manner suggesting these cells are equipped with BKPyV receptors, likely GD1b and  
371 GT1b(46). Upon attachment, BKPyV was shown to massively accumulate in pleiomorphous  
372 GRAF-1+ endocytic vesicles originating from the PM and partially overlapping with CTxB  
373 containing vesicles in MDDC. Although not proven here, it is tempting to speculate that a  
374 similar entry pathway for BKPyV occurs in CD1c-sorted cDC. This compartment was  
375 identified as CLIC/GEEC vesicles whose formation is clathrin-independent (see for review  
376 (72)). Interestingly, BKPyV was shown to infect hRPTEC in a clathrin- and caveolin-  
377 independent manner indicating that some BKPyV entry steps might be common between those  
378 cells and cDC(73, 74). Ewers and colleagues demonstrated that SV40 triggers the formation of  
379 PM invaginations related to CLIC/GEEC endocytosis after binding to GM1 in caveolin-1  
380 deficient or energy-depleted cells(48). Multiple interactions between chemically defined GM1  
381 PM clusters and SV40 capsomers were demonstrated to promote PM curvature and the  
382 formation of pleiomorphous tubules containing viral particles. CLIC/GEEC endocytosis has  
383 not been thoroughly documented for BKPyV before our results, even though Drachenberg et al



384 observed BKPyV virions within tubular structures in hRPTEC from PVAN biopsies(30).  
385 Whether these tubular vesicles result from early endocytosis or from viral progeny remains to  
386 be clarified. Although the microtubule-associated motor protein, dynein 1, was shown not to  
387 play a role in BKPyV(75), JCPyV and SV40 infection(76), here we demonstrated that a specific  
388 chemical inhibitor of the dynein protein family caused a measurable reduction of the *trans*-  
389 infection process by MDDC indicating distinct cell-specific requirements for BKPyV entry.  
390 After internalization, BKPyV(77), JCPyV(77, 78), SV40(77, 79) and MuPyV(80) were shown  
391 to reach the ER within the first ten hours after cell attachment to hRPTEC(46, 75). This step is  
392 crucial for the infection(46, 75, 81, 82) since it is followed by the release of partially uncoated  
393 virions in the cytosol and import of viral genomes to the nucleus to initiate replication. This  
394 question was not directly addressed in the present study but the absence of LTA<sub>g</sub> in MDDC  
395 after several days *pi* strongly suggests either BKPyV does not undergo uncoating or that the  
396 CLIC/GEEC endocytosis does not lead to productive infection. In non-immune cells,  
397 CLIC/GEEC was shown as the main productive AAV2 infection route, invalidating the second  
398 possibility(83). These discrepancies between our results and former studies might reflect  
399 multiple common as well as distinct BKPyV entry steps according to the cell type studied.  
400 Further work is needed to establish the molecular determinants of such differences between  
401 non-immune and immune cells like cDC. A recent review pointed out the link between the  
402 CLIC/GEEC endocytosis and glycosphingolipids (GSL) which encompass gangliosides in the  
403 establishment of cell polarity(72). DC polarization leading to the formation of a synapse is an  
404 important event in T cell priming (see for review(84)) but might also be crucial in the BKPyV  
405 *trans*-infection process we described here. GSL are known to form lipid rafts on the PM (see  
406 for review(85)). Such micro domains function as a platform to segregate a wide range of  
407 effector molecules including GPI-anchored cargos(86). Wang and colleagues demonstrated that  
408 GPI-anchored molecules, which utilize the CLIC/GEEC endocytic pathway upon ligand

409 binding, share biosynthetic pathways and common cellular locations with GSL(87). Such  
410 findings could link the ganglioside-mediated BKPyV attachment to viral endocytosis even in  
411 immune cells.

412 An important DC function is the ability to sense microbes through the recognition of conserved  
413 pathogen-associated molecular patterns (PAMP) by PM-bound (toll-like and C-type lectin  
414 receptors, TLR and CLR respectively), endosomal (TLR) or modified DNA/RNA cytoplasmic  
415 receptors altogether termed PRR(88). Viral particles as supramolecular arrangements of  
416 proteins and nucleic acids can be considered as PAMPs. Zepeda-Cervantes et al (Frontiers  
417 Immunol, 2020) have recently discussed numerous examples of VLP sensing leading to  
418 activation of human DC in a review(89). In contrast, both *in vitro*-generated murine and human  
419 DC were shown to remain unresponsive to BK- and JCPyV VLP(23, 26). Our results with  
420 human MDDC as well as freshly isolated blood and renal CD1c+ cDC confirm these  
421 observations and extend them to *bona fide* DC subsets supporting that such an immune  
422 ignorance towards BKPyV could exist *in vivo*. Two recent comprehensive studies demonstrated  
423 that hRPTEC fail to sense BKPyV(90, 91). This was shown to be partly dependent on the  
424 expression of the agnoprotein, a viral factor whose function has remained unclear so far(91).  
425 While BKPyV escape mechanisms seem to depend on viral gene expression in hRPTEC, we  
426 consider that different escape mechanisms are at work in BKPyV refractory cDC. The observed  
427 accumulation of BKPyV into CLIC/GEEC vesicles in MDDC after two hours might lead to  
428 their segregation in a PRR-free compartment. Unfortunately, whether PRR are present in the  
429 CLIC/GEEC compartment is unknown.

430 We demonstrated that although renal CD1c+ DC are refractory to BKPyV infection they remain  
431 able to capture virions and *trans*-infect hRPTEC *in vitro*. CD1c+ DC are normally present in  
432 the human renal interstitium surrounding the proximal tubules and glomeruli(29, 34, 71) but in  
433 PVAN lesions, a significant increase in infiltrating CD1c+ DC is documented(34). Whether the

434 CD1c+ DC infiltrate has a key role in viral spreading *in vivo* deserves to be investigated through  
435 combined multidimensional imaging techniques and spatial RNA/DNA sequencing. Upon  
436 inflammation, monocytes are recruited in tissues where they differentiate in inflammatory DC  
437 with transcriptomic profiles closely related to those observed in MDDC(68, 69). PVAN  
438 develops in an inflammatory context. Therefore, it is tempting to speculate that along with  
439 resident CD1c+ DC, inflammatory DC could participate in the potentiation of BKPyV  
440 infection.

441 In this study, we demonstrated that cDC, namely MDDC and blood or kidney CD1c+ resident  
442 DC can capture infectious BKPyV through an unprecedented endocytic pathway in cDC and  
443 for BKPyV, and transfer the virus to permissive cells like hRPTEC without DC activation or  
444 infection, suggesting a role for cDC in BKPyV spreading. Moreover, we showed that  
445 internalized virions were protected from neutralization by serum from KTR. Taken together our  
446 results support the idea that cDC could facilitate BKPyV infection by favoring its spreading  
447 and limiting specific T lymphocyte activation due to the cDC ignorance towards BKPyV  
448 antigens and the circumvention of neutralization by specific antibodies. Hence, this work could  
449 help to understand how cDC could aggravate BKPyV infection in KTR.

450

## 451 **Author contributions**

452 M.S. and F.H. designed, performed, analyzed and interpreted all experiments except RNAseq  
453 data and wrote the paper. F.C., C.P., C.B., A.G., S.N., P.H., J.V., N.M., J.D., P.G., J.B.-G.  
454 performed and analyzed experiments. K.R., C.K.-A. and J.B. collected and characterized all  
455 human samples used in this study. A.T., R.J., D.McI. and C.B.-B. participated in experimental  
456 design and data discussion and actively contributed to the manuscript preparation. M.G.

457 analyzed RNAseq data and deposited datasets on appropriate databases. F.H. supervised this  
458 study. All authors reviewed and approved the manuscript.

459

## 460 **Acknowledgments and financial disclosures**

461 The authors would like to thank Camille Roesch (Izon Sciences Europe Ltd.) for her help in the  
462 VLP and BKPyV particle titrations based on the TRPS technique and H  l  ne Roux and Felix  
463 Letertre for their technical assistance. This work was supported by the Fondation d'Entreprises  
464 Progreffe (Mathieu Sikorski's salary). This work was carried out in the context of the IHU-  
465 Cesti project, which received French government financial support managed by the Agence  
466 Nationale de la Recherche via the "Investment into the Future" program ANR-10-IBHU-005.  
467 The IHU- Cesti project is also supported by Nantes Metropole and the Pays de la Loire Region.  
468 The authors declare no conflict of interest. The funders had no role in study design, data  
469 collection and analysis, decision to publish, or preparation of the manuscript.

470

## 471 **References**

- 472 1. Gardner SD, Field AM, Coleman DV, Hulme B. New human papovavirus (B.K.)  
473 isolated from urine after renal transplantation. *Lancet*. 1971.
- 474 2. Seif I, Khoury G, Dhar R. The genome of human papovavirus BKV. *Cell*. 1979  
475 Dec;18(4):963-77. PubMed PMID: 229976.
- 476 3. Wright PJ, Di Mayorca G. Virion polypeptide composition of the human papovavirus  
477 BK: comparison with simian virus 40 and polyoma virus. *J Virol*. 1975 Apr;15(4):828-35.  
478 PubMed PMID: 163921. Pubmed Central PMCID: 354526.

- 479 4. Chesters PM, Heritage J, McCance DJ. Persistence of DNA sequences of BK virus and  
480 JC virus in normal human tissues and in diseased tissues. *J Infect Dis.* 1983 Apr;147(4):676-  
481 84. PubMed PMID: 6302172.
- 482 5. Egli A, Infanti L, Dumoulin A, Buser A, Samaridis J, Stebler C, et al. Prevalence of  
483 polyomavirus BK and JC infection and replication in 400 healthy blood donors. *J Infect Dis.*  
484 2009 Mar 15;199(6):837-46. PubMed PMID: 19434930.
- 485 6. Brown P, Tsai T, Gajdusek DC. Seroepidemiology of human papovaviruses. Discovery  
486 of virgin populations and some unusual patterns of antibody prevalence among remote peoples  
487 of the world. *American journal of epidemiology.* 1975 Oct;102(4):331-40. PubMed PMID:  
488 233851.
- 489 7. Flaegstad T, Traavik T, Kristiansen BE. Age-dependent prevalence of BK virus IgG and  
490 IgM antibodies measured by enzyme-linked immunosorbent assays (ELISA). *The Journal of*  
491 *hygiene.* 1986 Jun;96(3):523-8. PubMed PMID: 3016078. Pubmed Central PMCID: 2129697.
- 492 8. Heritage J, Chesters PM, McCance DJ. The persistence of papovavirus BK DNA  
493 sequences in normal human renal tissue. *Journal of Medical Virology.* 1981;8(2):143-50. en.
- 494 9. Cesaro S, Facchin C, Tridello G, Messina C, Calore E, Biasolo MA, et al. A prospective  
495 study of BK-virus-associated haemorrhagic cystitis in paediatric patients undergoing allogeneic  
496 haematopoietic stem cell transplantation. *Bone marrow transplantation.* 2008 Feb;41(4):363-  
497 70. PubMed PMID: 17982496.
- 498 10. Erard V, Storer B, Corey L, Nollkamper J, Huang ML, Limaye A, et al. BK virus  
499 infection in hematopoietic stem cell transplant recipients: frequency, risk factors, and  
500 association with postengraftment hemorrhagic cystitis. *Clinical infectious diseases : an official*  
501 *publication of the Infectious Diseases Society of America.* 2004 Dec 15;39(12):1861-5.  
502 PubMed PMID: 15578413.

- 503 11. Hirsch HH. Polyomavirus BK Nephropathy: A (Re-)emerging Complication in Renal  
504 Transplantation. *American Journal of Transplantation*. 2002;2(1):25-30. en.
- 505 12. Leung AY, Suen CK, Lie AK, Liang RH, Yuen KY, Kwong YL. Quantification of  
506 polyoma BK viruria in hemorrhagic cystitis complicating bone marrow transplantation. *Blood*.  
507 2001 Sep 15;98(6):1971-8. PubMed PMID: 11535537.
- 508 13. Bicalho CS, Oliveira RDR, David DR, Fink M, Agena F, Castro MC, et al.  
509 Determination of viremia cut-off for risk to develop BKPyV-associated nephropathy among  
510 kidney transplant recipients. *Transplant infectious disease : an official journal of the*  
511 *Transplantation Society*. 2018 Oct;20(5):e12969. PubMed PMID: 30074295.
- 512 14. Pollara CP, Corbellini S, Chiappini S, Sandrini S, De Tomasi D, Bonfanti C, et al.  
513 Quantitative viral load measurement for BKV infection in renal transplant recipients as a  
514 predictive tool for BKVAN. *The new microbiologica*. 2011 Apr;34(2):165-71. PubMed PMID:  
515 21617828.
- 516 15. Randhawa P, Ho A, Shapiro R, Vats A, Swalsky P, Finkelstein S, et al. Correlates of  
517 quantitative measurement of BK polyomavirus (BKV) DNA with clinical course of BKV  
518 infection in renal transplant patients. *Journal of clinical microbiology*. 2004 Mar;42(3):1176-  
519 80. PubMed PMID: 15004071. Pubmed Central PMCID: 356850.
- 520 16. Randhawa PS, Finkelstein S, Scantlebury V, Shapiro R, Vivas C, Jordan M, et al.  
521 Human polyoma virus-associated interstitial nephritis in the allograft kidney. *Transplantation*.  
522 1999;67(1):103-9. PubMed PMID: 9921805. English.
- 523 17. Binggeli S, Egli A, Schaub S, Binet I, Mayr M, Steiger J, et al. Polyomavirus BK-  
524 specific cellular immune response to VP1 and large T-antigen in kidney transplant recipients.  
525 *American journal of transplantation : official journal of the American Society of*  
526 *Transplantation and the American Society of Transplant Surgeons*. 2007 May;7(5):1131-9.  
527 PubMed PMID: 17359507.

- 528 18. Leboeuf C, Wilk S, Achermann R, Binet I, Golshayan D, Hadaya K, et al. BK  
529 Polyomavirus-Specific 9mer CD8 T Cell Responses Correlate With Clearance of BK Viremia  
530 in Kidney Transplant Recipients: First Report From the Swiss Transplant Cohort Study.  
531 American journal of transplantation : official journal of the American Society of  
532 Transplantation and the American Society of Transplant Surgeons. 2017 Oct;17(10):2591-600.  
533 PubMed PMID: 28326672.
- 534 19. Li J, Melenhorst J, Hensel N, Rezvani K, Sconocchia G, Kilical Y, et al. T-cell responses  
535 to peptide fragments of the BK virus T antigen: implications for cross-reactivity of immune  
536 response to JC virus. The Journal of general virology. 2006 Oct;87(Pt 10):2951-60. PubMed  
537 PMID: 16963754.
- 538 20. Mutlu E, Koksoy S, Mutlu D, Yilmaz VT, Kocak H, Dinckan A, et al. Quantitative  
539 analysis of BKV-specific CD4+ T cells before and after kidney transplantation. Transplant  
540 immunology. 2015 Sep;33(1):20-6. PubMed PMID: 26048051.
- 541 21. Lamarche C, Orio J, Georges-Tobar V, Pincez T, Goupil M, Dahmani A, et al. Clinical-  
542 Scale Rapid Autologous BK Virus-Specific T Cell Line Generation From Kidney Transplant  
543 Recipients With Active Viremia for Adoptive Immunotherapy. Transplantation. 2017  
544 Nov;101(11):2713-21. PubMed PMID: 28230645.
- 545 22. Drake III DR, Shawver ML, Hadley A, Butz E, Maliszewski C, Lukacher AE. Induction  
546 of Polyomavirus-Specific CD8+T Lymphocytes by Distinct Dendritic Cell Subpopulations.  
547 Journal of Virology. 2001 2001-01-01. en.
- 548 23. Lenz P, Day PM, Pang YY, Frye SA, Jensen PN, Lowy DR, et al. Papillomavirus-like  
549 particles induce acute activation of dendritic cells. Journal of immunology. 2001 May  
550 1;166(9):5346-55. PubMed PMID: 11313370.
- 551 24. Gedvilaite A, Kucinskaite-Kodze I, Lasickiene R, Timinskas A, Vaitiekaite A, Ziogiene  
552 D, et al. Evaluation of Trichodysplasia Spinulosa-Associated Polyomavirus Capsid Protein as

- 553 a New Carrier for Construction of Chimeric Virus-Like Particles Harboring Foreign Epitopes.  
554 Viruses. 2015 Jul 29;7(8):4204-29. PubMed PMID: 26230706. Pubmed Central PMCID:  
555 4576179.
- 556 25. Changyong C, Sun M, Li H, Brockmeyer N, Wu NP. Simian virus 40 inhibits  
557 differentiation and maturation of rhesus macaque DC-SIGN(+) dendritic cells. Eur J Med Res.  
558 2010 Sep 24;15(9):377-82. PubMed PMID: 20952346. Pubmed Central PMCID: 3351904.
- 559 26. Gedvilaite A, Dorn DC, Sasnauskas K, Pecher G, Bulavaite A, Lawatscheck R, et al.  
560 Virus-like particles derived from major capsid protein VP1 of different polyomaviruses differ  
561 in their ability to induce maturation in human dendritic cells. Virology. 2006;354(2):252-60.
- 562 27. Comoli P, Basso S, Azzi A, Moretta A, De Santis R, Del Galdo F, et al. Dendritic cells  
563 pulsed with polyomavirus BK antigen induce ex vivo polyoma BK virus-specific cytotoxic T-  
564 cell lines in seropositive healthy individuals and renal transplant recipients. Journal of the  
565 American Society of Nephrology : JASN. 2003 Dec;14(12):3197-204. PubMed PMID:  
566 14638918.
- 567 28. Kaur A, Wilhelm M, Wilk S, Hirsch HH. BK polyomavirus-specific antibody and T-  
568 cell responses in kidney transplantation: update. Current opinion in infectious diseases. 2019  
569 Dec;32(6):575-83. PubMed PMID: 31567736.
- 570 29. Woltman AM, de Fijter JW, Zuidwijk K, Vlug AG, Bajema IM, van der Kooij SW, et  
571 al. Quantification of dendritic cell subsets in human renal tissue under normal and pathological  
572 conditions. Kidney International. 2007;71(10):1001-8.
- 573 30. Drachenberg CB, Papadimitriou JC, Wali R, Cubitt CL, Ramos E. BK Polyoma Virus  
574 Allograft Nephropathy: Ultrastructural Features from Viral Cell Entry to Lysis. American  
575 Journal of Transplantation. 2003;3(11):1383-92. en.
- 576 31. Kassianos AJ, Sampangi S, Wang X, Roper KE, Beagley K, Healy H, et al. Human  
577 proximal tubule epithelial cells modulate autologous dendritic cell function. Nephrology,



- 578 dialysis, transplantation : official publication of the European Dialysis and Transplant  
579 Association - European Renal Association. 2013 Feb;28(2):303-12. PubMed PMID: 22610986.
- 580 32. Kassianos AJ, Wang X, Sampangi S, Afrin S, Wilkinson R, Healy H. Fractalkine–  
581 CX3CR1-dependent recruitment and retention of human CD1c+ myeloid dendritic cells by in  
582 vitro–activated proximal tubular epithelial cells. *Kidney International*. 2015;87(6):1153-63.
- 583 33. Sampangi S, Kassianos AJ, Wang X, Beagley KW, Klein T, Afrin S, et al. The  
584 Mechanisms of Human Renal Epithelial Cell Modulation of Autologous Dendritic Cell  
585 Phenotype and Function. *PLoS One*. 2015;10(7):e0134688. PubMed PMID: 26230727.  
586 Pubmed Central PMCID: 4521940.
- 587 34. Yapici U, Kers J, Slavujevic-Letic I, Stokman G, Roelofs JJTH, van Aalderen MC, et  
588 al. Intra-graft Blood Dendritic Cell Antigen-1-Positive Myeloid Dendritic Cells Increase during  
589 BK Polyomavirus-Associated Nephropathy. *Journal of the American Society of Nephrology*.  
590 2015;27(8):2502-10.
- 591 35. Hirsch HH, Randhawa P. BK Polyomavirus in Solid Organ Transplantation. *American*  
592 *Journal of Transplantation*. 2013;13(s4):179-88. en.
- 593 36. Kuypers DR. Management of polyomavirus-associated nephropathy in renal transplant  
594 recipients. *Nature reviews Nephrology*. 2012 Apr 17;8(7):390-402. PubMed PMID: 22508181.
- 595 37. Sallusto F, Lanzavecchia A. Efficient presentation of soluble antigen by cultured human  
596 dendritic cells is maintained by granulocyte/macrophage colony-stimulating factor plus  
597 interleukin 4 and downregulated by tumor necrosis factor alpha. *J Exp Med*. 1994 Apr  
598 01;179(4):1109-18. PubMed PMID: 8145033. Pubmed Central PMCID: 2191432.
- 599 38. Pastrana DV, Ray U, Magaldi TG, Schowalter RM, Cuburu N, Buck CB. BK  
600 polyomavirus genotypes represent distinct serotypes with distinct entry tropism. *J Virol*. 2013  
601 Sep;87(18):10105-13. PubMed PMID: 23843634. Pubmed Central PMCID: 3754014.

- 602 39. Moriyama T, Sorokin A. BK virus (BKV): infection, propagation, quantitation,  
603 purification, labeling, and analysis of cell entry. *Current protocols in cell biology*. 2009  
604 Mar;Chapter 26:Unit 26 2. PubMed PMID: 19283732. Pubmed Central PMCID: 2818100.
- 605 40. Pastrana DV, Brennan DC, Cuburu N, Storch GA, Viscidi RP, Randhawa PS, et al.  
606 Neutralization serotyping of BK polyomavirus infection in kidney transplant recipients. *PLoS*  
607 *pathogens*. 2012;8(4):e1002650. PubMed PMID: 22511874. Pubmed Central PMCID:  
608 3325208.
- 609 41. Halary F, Amara A, Lortat-Jacob H, Messerle M, Delaunay T, Houlès C, et al. Human  
610 Cytomegalovirus Binding to DC-SIGN Is Required for Dendritic Cell Infection and Target Cell  
611 trans-Infection. *Immunity*. 2002;17(5):653-64.
- 612 42. Haspot F, Lavault A, Sinzger C, Laib Sampaio K, Stierhof Y-D, Pilet P, et al. Human  
613 Cytomegalovirus Entry into Dendritic Cells Occurs via a Macropinocytosis-Like Pathway in a  
614 pH-Independent and Cholesterol-Dependent Manner. *PLoS ONE*. 2012;7(4):e34795.
- 615 43. Kilens S, Meistermann D, Moreno D, Chariou C, Gaignerie A, Reignier A, et al. Parallel  
616 derivation of isogenic human primed and naive induced pluripotent stem cells. *Nature*  
617 *communications*. 2018 Jan 24;9(1):360. PubMed PMID: 29367672. Pubmed Central PMCID:  
618 5783949.
- 619 44. Touze A, Bousarghin L, Ster C, Combata AL, Roingard P, Coursaget P. Gene transfer  
620 using human polyomavirus BK virus-like particles expressed in insect cells. *The Journal of*  
621 *general virology*. 2001 Dec;82(Pt 12):3005-9. PubMed PMID: 11714977.
- 622 45. Touze A, Gaitan J, Arnold F, Cazal R, Fleury MJ, Combelas N, et al. Generation of  
623 Merkel cell polyomavirus (MCV)-like particles and their application to detection of MCV  
624 antibodies. *Journal of clinical microbiology*. 2010 May;48(5):1767-70. PubMed PMID:  
625 20181914. Pubmed Central PMCID: 2863896.

- 626 46. Low JA, Magnuson B, Tsai B, Imperiale MJ. Identification of Gangliosides GD1b and  
627 GT1b as Receptors for BK Virus. *Journal of Virology*. 2006;80(3):1361-6.
- 628 47. Sharma PM, Gupta G, Vats A, Shapiro R, Randhawa P. Phylogenetic analysis of  
629 polyomavirus BK sequences. *J Virol*. 2006 Sep;80(18):8869-79. PubMed PMID: 16940499.  
630 Pubmed Central PMCID: 1563921.
- 631 48. Ewers H, Romer W, Smith AE, Bacia K, Dmitrieff S, Chai W, et al. GM1 structure  
632 determines SV40-induced membrane invagination and infection. *Nat Cell Biol*. 2010  
633 Jan;12(1):11-8; sup pp 1-2. PubMed PMID: 20023649.
- 634 49. Kirkham M, Fujita A, Chadda R, Nixon SJ, Kurzchalia TV, Sharma DK, et al.  
635 Ultrastructural identification of uncoated caveolin-independent early endocytic vehicles. *The*  
636 *Journal of cell biology*. 2005 Jan 31;168(3):465-76. PubMed PMID: 15668297. Pubmed  
637 Central PMCID: 2171740.
- 638 50. Sabharanjak S, Sharma P, Parton RG, Mayor S. GPI-anchored proteins are delivered to  
639 recycling endosomes via a distinct cdc42-regulated, clathrin-independent pinocytic pathway.  
640 *Developmental cell*. 2002 Apr;2(4):411-23. PubMed PMID: 11970892.
- 641 51. Lundmark R, Doherty GJ, Howes MT, Cortese K, Vallis Y, Parton RG, et al. The  
642 GTPase-activating protein GRAF1 regulates the CLIC/GEEC endocytic pathway. *Current*  
643 *biology : CB*. 2008 Nov 25;18(22):1802-8. PubMed PMID: 19036340. Pubmed Central  
644 PMCID: 2726289.
- 645 52. Cheneau C, Coulon F, Porkolab V, Fieschi F, Laurant S, Razanajaona-Doll D, et al. Fine  
646 Mapping the Interaction Between Dendritic Cell-Specific Intercellular Adhesion Molecule  
647 (ICAM)-3-Grabbing Nonintegrin and the Cytomegalovirus Envelope Glycoprotein B. *J Infect*  
648 *Dis*. 2018 Jul 2;218(3):490-503. PubMed PMID: 29648611. Pubmed Central PMCID:  
649 6049025.

- 650 53. Ye Y, Meyer HH, Rapoport TA. The AAA ATPase Cdc48/p97 and its partners transport  
651 proteins from the ER into the cytosol. *Nature*. 2001 Dec 6;414(6864):652-6. PubMed PMID:  
652 11740563.
- 653 54. Du J, Wu Z, Ren S, Wei Y, Gao M, Randolph GJ, et al. TLR8 agonists stimulate newly  
654 recruited monocyte-derived cells into potent APCs that enhance HBsAg immunogenicity.  
655 *Vaccine*. 2010 Aug 31;28(38):6273-81. PubMed PMID: 20637759. Pubmed Central PMCID:  
656 3031106.
- 657 55. Thoma-Uszynski S, Kiertscher SM, Ochoa MT, Bouis DA, Norgard MV, Miyake K, et  
658 al. Activation of toll-like receptor 2 on human dendritic cells triggers induction of IL-12, but  
659 not IL-10. *Journal of immunology*. 2000 Oct 1;165(7):3804-10. PubMed PMID: 11034386.
- 660 56. Picarda G, Cheneau C, Humbert JM, Beriou G, Pilet P, Martin J, et al. Functional  
661 Langerinhigh-Expressing Langerhans-like Cells Can Arise from CD14highCD16- Human  
662 Blood Monocytes in Serum-Free Condition. *Journal of immunology*. 2016 May 1;196(9):3716-  
663 28. PubMed PMID: 27016604.
- 664 57. Manel N, Hogstad B, Wang Y, Levy DE, Unutmaz D, Littman DR. A cryptic sensor for  
665 HIV-1 activates antiviral innate immunity in dendritic cells. *Nature*. 2010;467(7312):214-7.
- 666 58. Drillien R, Spehner D, Hanau D. Modified vaccinia virus Ankara induces moderate  
667 activation of human dendritic cells. *The Journal of general virology*. 2004 Aug;85(Pt 8):2167-  
668 75. PubMed PMID: 15269355.
- 669 59. Pascutti MF, Rodriguez AM, Falivene J, Giavedoni L, Drexler I, Gherardi MM.  
670 Interplay between modified vaccinia virus Ankara and dendritic cells: phenotypic and  
671 functional maturation of bystander dendritic cells. *J Virol*. 2011 Jun;85(11):5532-45. PubMed  
672 PMID: 21411535. Pubmed Central PMCID: 3094969.

- 673 60. Tao R, Li L, Huang W, Zheng L. Activation of human dendritic cells by recombinant  
674 modified vaccinia virus Ankara vectors encoding survivin and IL-2 genes in vitro. *Human gene*  
675 *therapy*. 2010 Jan;21(1):98-108. PubMed PMID: 19715401.
- 676 61. Trevor KT, Hersh EM, Brailey J, Balloul JM, Acres B. Transduction of human dendritic  
677 cells with a recombinant modified vaccinia Ankara virus encoding MUC1 and IL-2. *Cancer*  
678 *immunology, immunotherapy : CII*. 2001 Oct;50(8):397-407. PubMed PMID: 11726134.
- 679 62. Bohl DL, Brennan DC, Ryschkewitsch C, Gaudreault-Keener M, Major EO, Storch GA.  
680 BK virus antibody titers and intensity of infections after renal transplantation. *Journal of clinical*  
681 *virology : the official publication of the Pan American Society for Clinical Virology*. 2008  
682 Oct;43(2):184-9. PubMed PMID: 18676176. Pubmed Central PMCID: 2701220.
- 683 63. Chen Y, Trofe J, Gordon J, Du Pasquier RA, Roy-Chaudhury P, Kuroda MJ, et al.  
684 Interplay of cellular and humoral immune responses against BK virus in kidney transplant  
685 recipients with polyomavirus nephropathy. *J Virol*. 2006 Apr;80(7):3495-505. PubMed PMID:  
686 16537617. Pubmed Central PMCID: 1440396.
- 687 64. Comoli P, Azzi A, Maccario R, Basso S, Botti G, Basile G, et al. Polyomavirus BK-  
688 specific immunity after kidney transplantation. *Transplantation*. 2004 Oct 27;78(8):1229-32.  
689 PubMed PMID: 15502726.
- 690 65. Randhawa PS, Gupta G, Vats A, Shapiro R, Viscidi RP. Immunoglobulin G, A, and M  
691 responses to BK virus in renal transplantation. *Clinical and vaccine immunology : CVI*. 2006  
692 Sep;13(9):1057-63. PubMed PMID: 16960119. Pubmed Central PMCID: 1563576.
- 693 66. Schachtner T, Muller K, Stein M, Diezemann C, Sefrin A, Babel N, et al. BK virus-  
694 specific immunity kinetics: a predictor of recovery from polyomavirus BK-associated  
695 nephropathy. *American journal of transplantation : official journal of the American Society of*  
696 *Transplantation and the American Society of Transplant Surgeons*. 2011 Nov;11(11):2443-52.  
697 PubMed PMID: 21831150.

- 698 67. Lindner JM, Cornacchione V, Sathe A, Be C, Srinivas H, Riquet E, et al. Human  
699 Memory B Cells Harbor Diverse Cross-Neutralizing Antibodies against BK and JC  
700 Polyomaviruses. *Immunity*. 2019 Mar 19;50(3):668-76 e5. PubMed PMID: 30824324.
- 701 68. Goudot C, Coillard A, Villani AC, Gueguen P, Cros A, Sarkizova S, et al. Aryl  
702 Hydrocarbon Receptor Controls Monocyte Differentiation into Dendritic Cells versus  
703 Macrophages. *Immunity*. 2017 Sep 19;47(3):582-96 e6. PubMed PMID: 28930664.
- 704 69. Segura E, Touzot M, Bohineust A, Cappuccio A, Chiocchia G, Hosmalin A, et al.  
705 Human inflammatory dendritic cells induce Th17 cell differentiation. *Immunity*. 2013 Feb  
706 21;38(2):336-48. PubMed PMID: 23352235.
- 707 70. MacDonald KP, Munster DJ, Clark GJ, Dzionek A, Schmitz J, Hart DN.  
708 Characterization of human blood dendritic cell subsets. *Blood*. 2002 Dec 15;100(13):4512-20.  
709 PubMed PMID: 12393628.
- 710 71. Zuidwijk K, de Fijter JW, Mallat MJK, Eikmans M, van Groningen MC, Goemaere NN,  
711 et al. Increased influx of myeloid dendritic cells during acute rejection is associated with  
712 interstitial fibrosis and tubular atrophy and predicts poor outcome. *Kidney International*.  
713 2012;81(1):64-75.
- 714 72. Shafaq-Zadah M, Dransart E, Johannes L. Clathrin-independent endocytosis, retrograde  
715 trafficking, and cell polarity. *Current opinion in cell biology*. 2020 Jul 17;65:112-21. PubMed  
716 PMID: 32688213.
- 717 73. Moriyama T, Marquez JP, Tetsuro W, Andrey S. Caveolar Endocytosis Is Critical for  
718 BK Virus Infection of Human Renal Proximal Tubular Epithelial Cells. *Journal of Virology*.  
719 2007 2007-08-15. en.
- 720 74. Zhao L, Marciano AT, Rivet CR, Imperiale MJ. Caveolin- and clathrin-independent  
721 entry of BKPyV into primary human proximal tubule epithelial cells. *Virology*. 2016;492:66-  
722 72.

- 723 75. Moriyama T, Sorokin A. Intracellular trafficking pathway of BK Virus in human renal  
724 proximal tubular epithelial cells. *Virology*. 2008 Feb 20;371(2):336-49. PubMed PMID:  
725 17976677. Pubmed Central PMCID: 2674336.
- 726 76. Ashok A, Atwood WJ. Contrasting roles of endosomal pH and the cytoskeleton in  
727 infection of human glial cells by JC virus and simian virus 40. *J Virol*. 2003 Jan;77(2):1347-  
728 56. PubMed PMID: 12502851. Pubmed Central PMCID: 140837.
- 729 77. Nelson CD, Carney DW, Derdowski A, Lipovsky A, Gee GV, O'Hara B, et al. A  
730 retrograde trafficking inhibitor of ricin and Shiga-like toxins inhibits infection of cells by  
731 human and monkey polyomaviruses. *mBio*. 2013 Nov 12;4(6):e00729-13. PubMed PMID:  
732 24222489. Pubmed Central PMCID: 3892778.
- 733 78. Nelson CD, Stroh LJ, Gee GV, O'Hara BA, Stehle T, Atwood WJ. Modulation of a pore  
734 in the capsid of JC polyomavirus reduces infectivity and prevents exposure of the minor capsid  
735 proteins. *J Virol*. 2015 Apr;89(7):3910-21. PubMed PMID: 25609820. Pubmed Central  
736 PMCID: 4403419.
- 737 79. Norkin LC, Anderson HA, Wolfrom SA, Oppenheim A. Caveolar endocytosis of simian  
738 virus 40 is followed by brefeldin A-sensitive transport to the endoplasmic reticulum, where the  
739 virus disassembles. *J Virol*. 2002 May;76(10):5156-66. PubMed PMID: 11967331. Pubmed  
740 Central PMCID: 136127.
- 741 80. Maru S, Jin G, Desai D, Amin S, Shwetank, Lauver MD, et al. Inhibition of Retrograde  
742 Transport Limits Polyomavirus Infection In Vivo. *mSphere*. 2017 Nov-Dec;2(6). PubMed  
743 PMID: 29152583. Pubmed Central PMCID: 5687923.
- 744 81. Bennett SM, Jiang M, Imperiale MJ. Role of cell-type-specific endoplasmic reticulum-  
745 associated degradation in polyomavirus trafficking. *J Virol*. 2013 Aug;87(16):8843-52.  
746 PubMed PMID: 23740996. Pubmed Central PMCID: 3754070.

- 747 82. Jiang M, Abend JR, Tsai B, Imperiale MJ. Early Events during BK Virus Entry and  
748 Disassembly. *Journal of Virology*. 2008;83(3):1350-8.
- 749 83. Nonnenmacher M, Weber T. Adeno-associated virus 2 infection requires endocytosis  
750 through the CLIC/GEEC pathway. *Cell host & microbe*. 2011 Dec 15;10(6):563-76. PubMed  
751 PMID: 22177561. Pubmed Central PMCID: 3257174.
- 752 84. Benvenuti F. The Dendritic Cell Synapse: A Life Dedicated to T Cell Activation.  
753 *Frontiers in immunology*. 2016;7:70. PubMed PMID: 27014259. Pubmed Central PMCID:  
754 4780025.
- 755 85. Gupta G, Surolia A. Glycosphingolipids in microdomain formation and their spatial  
756 organization. *FEBS letters*. 2010 May 3;584(9):1634-41. PubMed PMID: 19941856.
- 757 86. Brown DA, London E. Structure and origin of ordered lipid domains in biological  
758 membranes. *The Journal of membrane biology*. 1998 Jul 15;164(2):103-14. PubMed PMID:  
759 9662555.
- 760 87. Wang Y, Maeda Y, Liu YS, Takada Y, Ninomiya A, Hirata T, et al. Cross-talks of  
761 glycosylphosphatidylinositol biosynthesis with glycosphingolipid biosynthesis and ER-  
762 associated degradation. *Nature communications*. 2020 Feb 13;11(1):860. PubMed PMID:  
763 32054864. Pubmed Central PMCID: 7018848.
- 764 88. Iwasaki A, Medzhitov R. Control of adaptive immunity by the innate immune system.  
765 *Nature immunology*. 2015 Apr;16(4):343-53. PubMed PMID: 25789684. Pubmed Central  
766 PMCID: 4507498.
- 767 89. Zepeda-Cervantes J, Ramirez-Jarquín JO, Vaca L. Interaction Between Virus-Like  
768 Particles (VLPs) and Pattern Recognition Receptors (PRRs) From Dendritic Cells (DCs):  
769 Toward Better Engineering of VLPs. *Frontiers in immunology*. 2020;11:1100. PubMed PMID:  
770 32582186. Pubmed Central PMCID: 7297083.



771 90. Caller LG, Davies CTR, Antrobus R, Lehner PJ, Weekes MP, Crump CM. Temporal  
772 Proteomic Analysis of BK Polyomavirus Infection Reveals Virus-Induced G2 Arrest and  
773 Highly Effective Evasion of Innate Immune Sensing. *J Virol*. 2019 Aug 15;93(16). PubMed  
774 PMID: 31142673. Pubmed Central PMCID: 6675895.

775 91. Manzetti J, Weissbach FH, Graf FE, Unterstab G, Wernli M, Hopfer H, et al. BK  
776 Polyomavirus Evades Innate Immune Sensing by Disrupting the Mitochondrial Network and  
777 Promotes Mitophagy. *iScience*. 2020 Jul 24;23(7):101257. PubMed PMID: 32599557. Pubmed  
778 Central PMCID: 7326741.

779

## 780 **Figure legends**

781 **Figure 1:** MDDC bind BKPyV particles in a dose- and sialic acid-dependent manner. (A)  
782 Negative contrast TEM picture of genotype Ib2 (gIb2) VLP. A 200nm scale bar is represented  
783 on the micrograph. (B) Fluorescent-labelled gIb2 VLP binding to hRPTEC, HEK293TT,  
784 MDDC and LNCaP (n=3) assessed by flow cytometry. Mean Fluorescence Intensities (MFI)  
785 are displayed (n=5; n=3 for LNCaP only). . (C) Alexa Fluor®647-conjugated infectious  
786 particles (Dunlop strain) gIb2 VLP binding to MDDC (n=5). (D) Dose dependent binding of  
787 genotypes Ia (circle), Ib2 (square) and IVb1 (triangle) VLP to MDDC (n=5). (E) Alexa  
788 Fluor®647-conjugated genotypes Ia, Ib2 and IVb1 VLP ( $10^4$  VLP/cell) binding to MDDC with  
789 (empty circles) or w/o (closed circles) treatment with 0.2U/mL neuraminidase from *Clostridium*  
790 *perfringens*, specifically cleaving  $\alpha(2,3/6/8)$ -linked sialic acid. Data are represented as MFI  $\pm$   
791 SEM. Statistically significant results were marked by one or several asterisks according to the  
792 level of significance: \*= $p<0.05$ , \*\*= $p<0.01$ , \*\*\*\*= $p<0.0001$ ; one-way ANOVA with Tukey's  
793 multiple comparison tests.

794

795 **Figure 2:** High-resolution confocal images of genotype Ia BKPyV particles endocytosed in  
796 MDDC. Three panels showing independent cells that contain intracellular dot-like or  
797 amorphous tube-shaped (white asterisk) accumulations of Alexa Fluor®647-conjugated gIa  
798 VLP (A) or BKPyV infectious particles (B; Dunlop strain). Images show focal planes extracted  
799 from six different cells stacks ( $10^4$  VLP/cell or 1FFU/cell respectively for VLP and infectious  
800 particles; magenta). (C) Two distinct focal planes extracted from the cell stack from which the  
801 image in the center of Figure 2A is shown. “1” and “2” indicate the tube-shaped structures  
802 marked by asterisks in Figure 2A. (D) Amira 3D reconstruction of the cell represented in Figure  
803 2A (center) showing round-shaped and pleiomorphous tube-shaped intracellular structures  
804 containing Alexa Fluor®647-conjugated gIa VLP. Cell membranes were stained with  
805 fluorescence-labelled WGA (Alexa Fluor®488 displayed in light blue) and nuclei were  
806 counterstained with DAPI. High-resolution confocal images were obtained from the A1 Nikon  
807 microscope equipped with a SIM module.

808

809 **Figure 3:** TEM reveals unlabeled BKPyV endocytosis into large round- and tube-shaped  
810 vesicles in MDDC. (A) Micrograph showing a general view of a representative MDDC  
811 incubated for 30 minutes at 37°C with  $10^4$  VLP/cell (gIb2). Noticeably, the cell contains  
812 abundant tube-shaped structures. (B, C, D, E and G) Pleiomorphous or large round vesicles  
813 containing VLP are shown at a higher magnification (G: x100,000-120,000). (F) This image  
814 represents infectious BKPyV particles into macropinosome-like (round-shaped) and tube-  
815 shaped vesicles (1FFU/cell). (D) and (E) Micrographs showing VLP internalization from the  
816 cell surface into tube-shaped endosomes. Thin and bold arrows indicate particles and tube  
817 formation respectively; asterisk indicate large vesicles resembling macropinosomes.  
818 N=nucleus; mt=mitochondria. Scale bars are indicated for each micrograph.

819

820 **Figure 4:** BKPyV particles colocalize with EEA-1, GRAF-1 and CTxB in MDDC revealing an  
821 unconventional endocytic pathway. (A) Confocal sections of MDDC incubated for 30 minutes  
822 at 37°C with 10<sup>4</sup> fluorescent VLP/cell (magenta). EEA-1-positive endocytic vesicles were  
823 stained after fixation (green). Nuclei were counterstained with DAPI (light blue). The  
824 colocalization between VLP and EEA-1 is shown in white. (B) RGB profiles along two  
825 measurement lines (1 and 2, showed in Figure 3A) analyzed with ImageJ software.  
826 Colocalization is represented by merging blue and red (=magenta) representing VLP and green  
827 histograms (1 pixel=88nm). (C) and (D) show respectively colocalization of BKPyV VLP with  
828 GRAF-1 (bold white arrows) and Alexa Fluor®555-conjugated cholera toxin subunit B (CTxB;  
829 2µg/mL; thin white arrows). Deconvoluted images are presented. Displayed data are  
830 representative of three independent experiments.

831  
832 **Figure 5:** MDDC do not support BKPyV infection but mediate its transmission to primary  
833 hRPTEC. (A) Epifluorescence microscope images (x10 magnification) showing large T antigen  
834 (LTA<sub>g</sub>) immunostaining (green) of hRPTEC and/or MDDC in various conditions indicated on  
835 top of rows, respectively: hRPTEC alone (medium), MDDC alone (medium), BKPyV-infected  
836 hRPTEC (MOI=0.1; approximately 200 particles/cell), non-infected hRPTEC layered with  
837 BKPyV-infected MDDC (excess of virus, i.e. unbound virus, was removed by extensive washes  
838 after a 2 hour-incubation of MDDC with virus) and BKPyV-infected MDDC (*idem* previous  
839 condition). LTA<sub>g</sub> is revealed at seven days dpi. Brightfield images of the immunostaining are  
840 shown in the first column. DC-SIGN (red) is a marker allowing to discriminate MDDC from  
841 hRPTEC when necessary. Nuclei were counterstained with DAPI. (B) RT-qPCR data showing  
842 the amplification of LTA<sub>g</sub> mRNA seven dpi in various conditions (similar to those presented  
843 in Figure 6A; n=6). Of note, a condition with uninfected MDDC with uninfected hRPTEC has  
844 been added here. (C) Western blot analysis of VP1 expression, as a late BKPyV infection event,

845 in cell lysates after three, five, and seven days post-infection.  $\beta$  actin was revealed similarly  
846 after membrane stripping as a loading control. Figures 5A and 5C are representative of three  
847 independent experiments.

848

849 **Figure 6:** BKPyV virions or BKPyV-infected cells fail to activate MDDC. (A) CD86 cell  
850 surface expression was assessed by flow cytometry on immature MDDC alone (circles) or  
851 cultured with VLP (squares;  $10^3$  particles/cell), BKPyV particles (triangles;  $10^3$  particles/cell)  
852 MVA (inverted triangles) or a TLR agonist cocktail (diamonds; 100ng/mL LPS and 1 $\mu$ g/mL  
853 R848 after 24 hours (n=6). (B) ELISA titration of IL-10, IL-12p70 and IL-8 in the supernatants  
854 of untreated or MDDC cultivated with VLP, BKPyV particles or R848/LPS (doses were similar  
855 to those employed in Figure 4a). (C) Cell surface expression of CD80, CD83, CD40, CCR6,  
856 CCR7 and the HLA-DR on MDDC alone (empty bars) or cultured for 24 hours with VLP (grey  
857 bars;  $10^3$  particles/cell) or LPS/R848 (black bars). Data are represented as MFI  $\pm$  SEM. For  
858 each MFI, background, i.e. autofluorescence, is subtracted to calculate  $\Delta$ MFI values displayed  
859 in this figure (n=4). (D) Similar to experiments in A. Apop=apoptotic cells. Apoptosis was  
860 induced by UVB-irradiation and apoptotic cell fragments were collected by centrifugation and  
861 extensive washing in PBS. (E) RNAseq analysis of differentially expressed genes between  
862 infected (one dpi) and non-infected MDDC. The dashed line represents a “ten counts per gene”  
863 limit above which gene expression is considered as robust. The Y axis represents the Log2 fold  
864 change in gene expression. Statistically significant results were marked by one or several  
865 asterisks according to the level of significance: ns=non-significant, \*=p<0.05, \*\*=p<0.01,  
866 \*\*\*=p<0.001, \*\*\*\*=p<0.0001; one-way ANOVA with Tukey’s multiple comparison tests.

867

868 **Figure 7:** Endocytosed BKPyV particles into MDDC are protected from serum neutralization.  
869 HCS automated counting to evaluate percentages of BKPyV-infected hRPTEC (=LTA $g^+$  cells)

870 in various conditions including *cis*- and *trans*-infection experiments but with or w/o sera from  
871 a non-controller patient (=control serum) or a controller patient (=neutralizing serum).  
872 Neutralizing antibody titers in this serum had been previously determined: between 1/200.000,  
873 1/500.000 and 1/20.000 for genotypes Ia, Ib2 and IVc2 respectively (see the Materials and  
874 Methods section). Here, both sera were x1000-diluted. Sera were either added before or after  
875 incubation of the BKPyV suspension (Dunlop strain at MOI=0.1) with MDDC. Results  
876 represent mean values of the percentage of LTA<sub>g</sub><sup>+</sup> hRPTEC ± SEM. Statistically significant  
877 results are marked by an asterisk; \*=*p*<0.05; one-way ANOVA with Tukey's multiple  
878 comparison tests.

879

880 **Figure 8:** Blood and kidney CD1c<sup>+</sup> myeloid DC bind and transmit BKPyV to primary hRPTEC  
881 without getting infected. (A) Quantitative measurement of VLP positive cDC and plasmacytoid  
882 (pDC) DC in whole blood of healthy volunteers according to the gating strategy shown in  
883 Supplemental Figure 1. (B) Quantitative analysis of VLP binding to cDC with (closed squares)  
884 or w/o (closed circles) Fc receptor blockade. Dose-dependent BKPyV VLP (C) or infectious  
885 particles (D) binding to purified CD1c<sup>+</sup> cDC from blood or kidney of healthy individuals; the  
886 “control” condition means no VLP (grey circles). Black closed and empty circles represent 10<sup>3</sup>  
887 and 10<sup>4</sup> particles/cell respectively. The immunomagnetic cell sorting strategy is shown in  
888 Supplemental Figure 1. (E) CD86 cell surface expression assessed by flow cytometry on freshly  
889 isolated blood CD1c<sup>+</sup> DC cultured for 24 hours in medium alone (squares) or with VLP  
890 (triangles; 10<sup>3</sup> particles per cells), BKPyV particles (inverted triangles; *ibid*) or with LPS/R848  
891 (diamonds; 100ng/mL LPS and 1µg/mL R848); n=4 distinct blood donors. (F) Quantitative  
892 assessment of the ability of CD1c<sup>+</sup> mDC from blood (grey dots) or kidney (black dots), ie from  
893 healthy blood donors and macroscopically healthy parts of resected human tumor-bearing  
894 kidneys, to capture and transfer BKPyV to hRPTEC as shown in Figure 6A. The percentage of

895 infected hRPTEC corresponds to the percentage of LTA<sub>g</sub><sup>+</sup> hRPTEC within total cells, ie DAPI  
896 counterstained nuclei (42), based on an automated counting on a HCS device. Data are  
897 represented as percentage of infection. Statistical analyses have been applied to comparisons  
898 between % of infected hRPTEC in coculture with cDC with or w/o cDC preincubation with the  
899 Dunlop strain. Statistically significant results are marked by an asterisk; \*= $p < 0.05$ , \*\*= $p < 0.01$ ,  
900 \*\*\*= $p < 0.001$ ; one-way ANOVA with Tukey's multiple comparison tests.

901

## 902 **Supplemental material**

903 **Supplemental Figure 1:** Gating strategy of myeloid (CD11c<sup>+</sup> in CD45<sup>+</sup>, HLA-DR<sup>+</sup>, Lin-  
904 cells) and plasmacytoid DC (CD123<sup>+</sup> in CD45<sup>+</sup>, HLA-DR<sup>+</sup>, Lin- cells) in whole blood of  
905 healthy volunteers. Cells were incubated with 2.5 $\mu$ g/mL of Alexa Fluor®647 coupled-VLP or  
906 the same volume of PBS (no VLP; 45 minutes at 4°C) and representative dot plots showing the  
907 percentage of VLP<sup>+</sup> cells.

908

909 **Supplemental Figure 2:** Assessment of purity of freshly isolated CD1c<sup>+</sup> DC from blood and  
910 kidney. (A) Gating and enrichment evaluation before and after immunomagnetic cell sorting of  
911 CD19<sup>-</sup> CD1c<sup>+</sup> myeloid blood DC. (B) Similar dot plots showing the purity of CD1c<sup>+</sup> myeloid  
912 DC from resected human kidneys before and after the FACS-assisted sorting. These results are  
913 representative of five different cell isolations from both blood and kidney compartments.

# Figure 1:

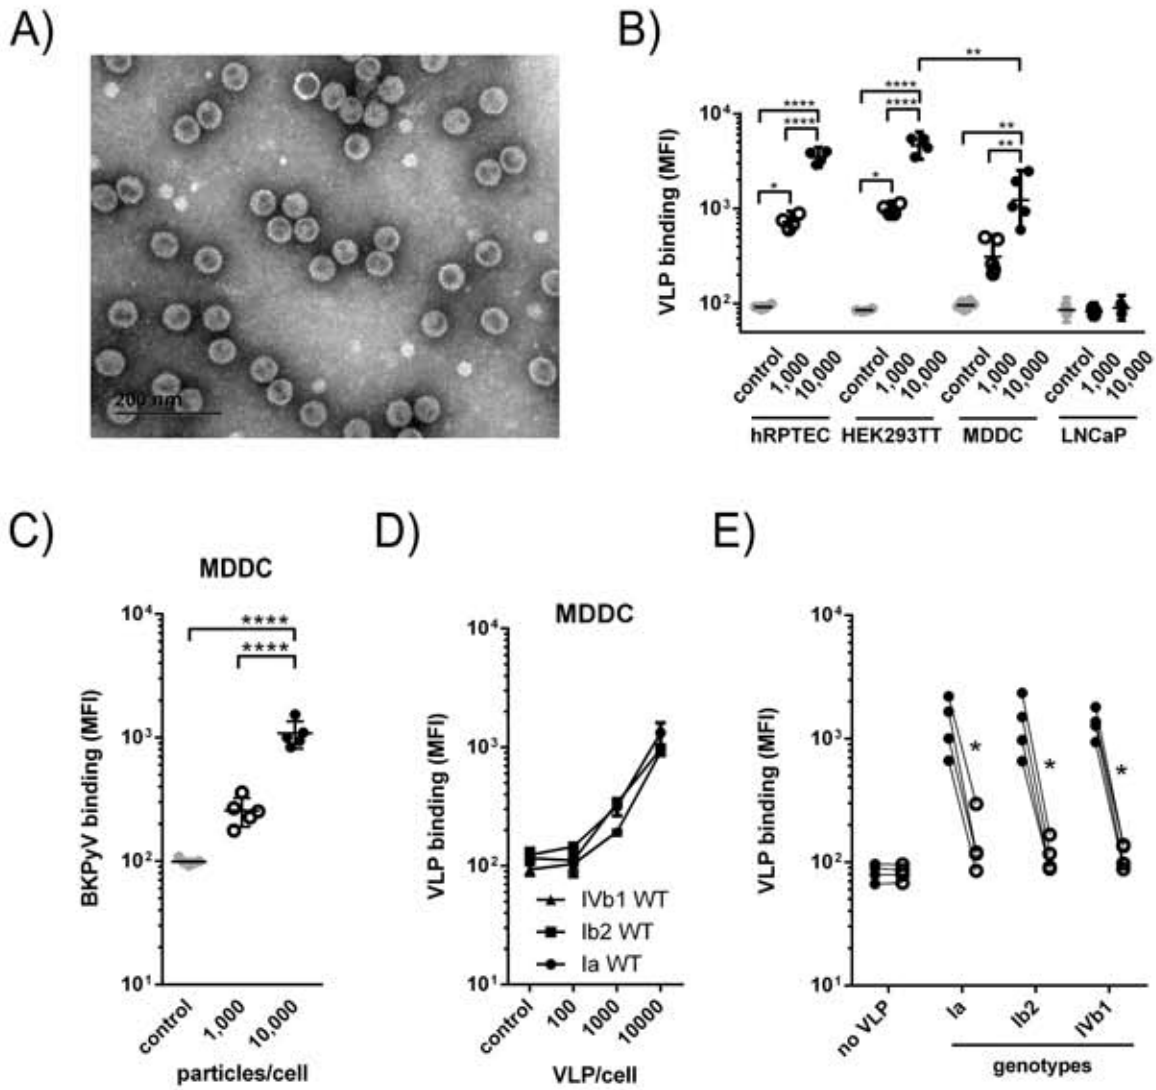

A)

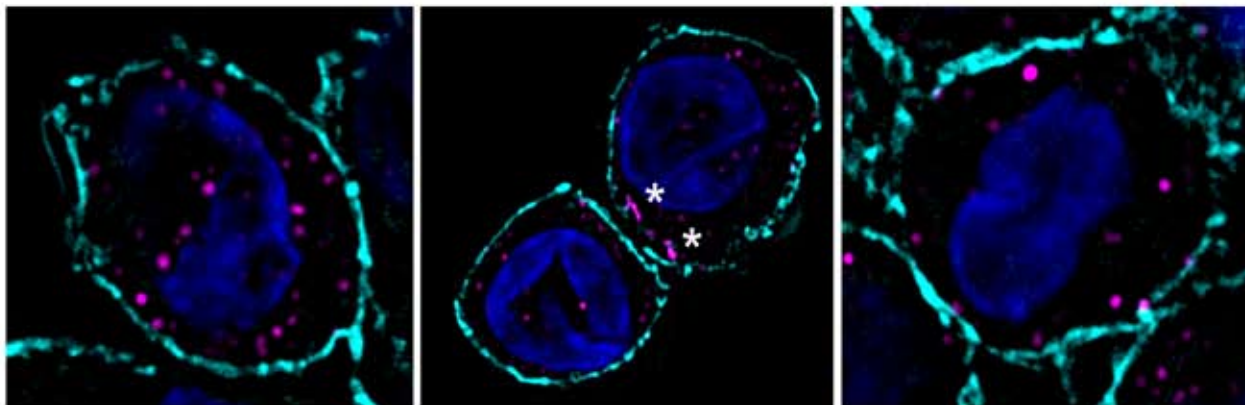

B)

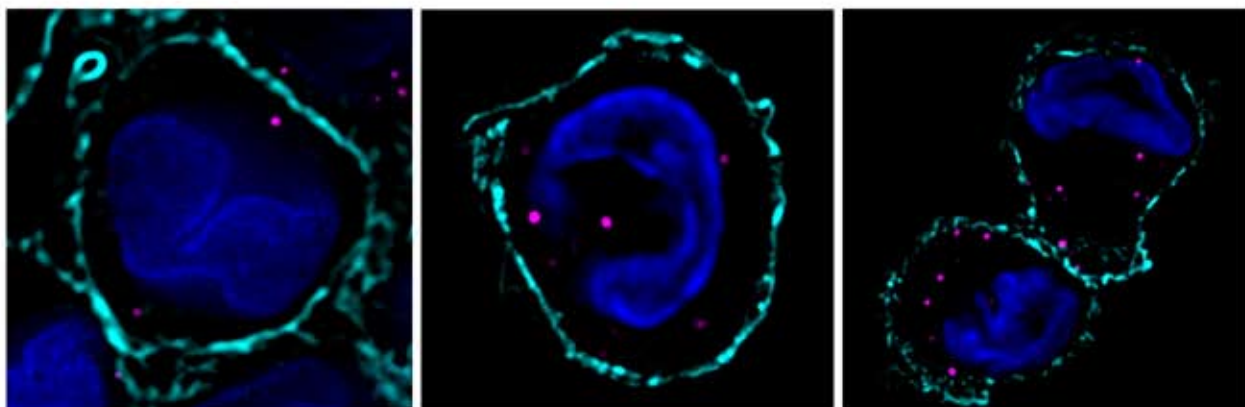

C)

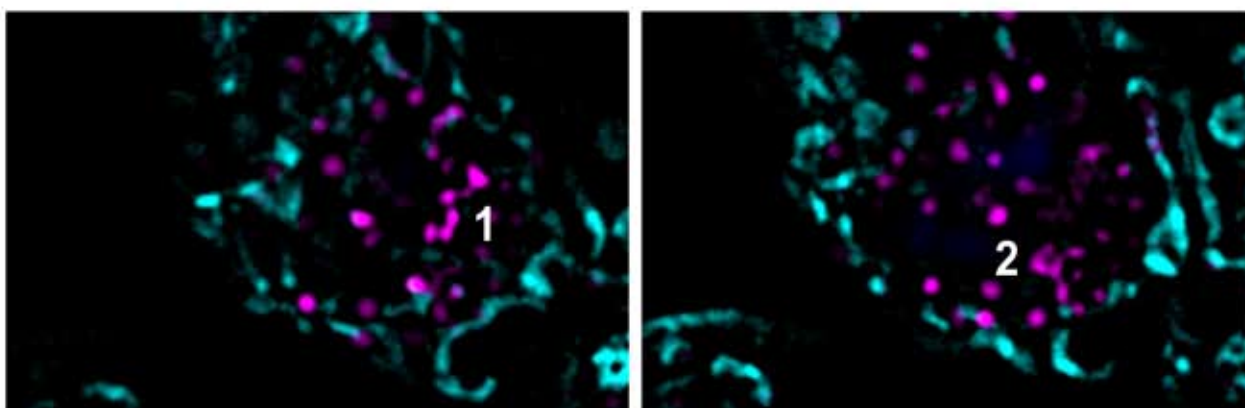

D)

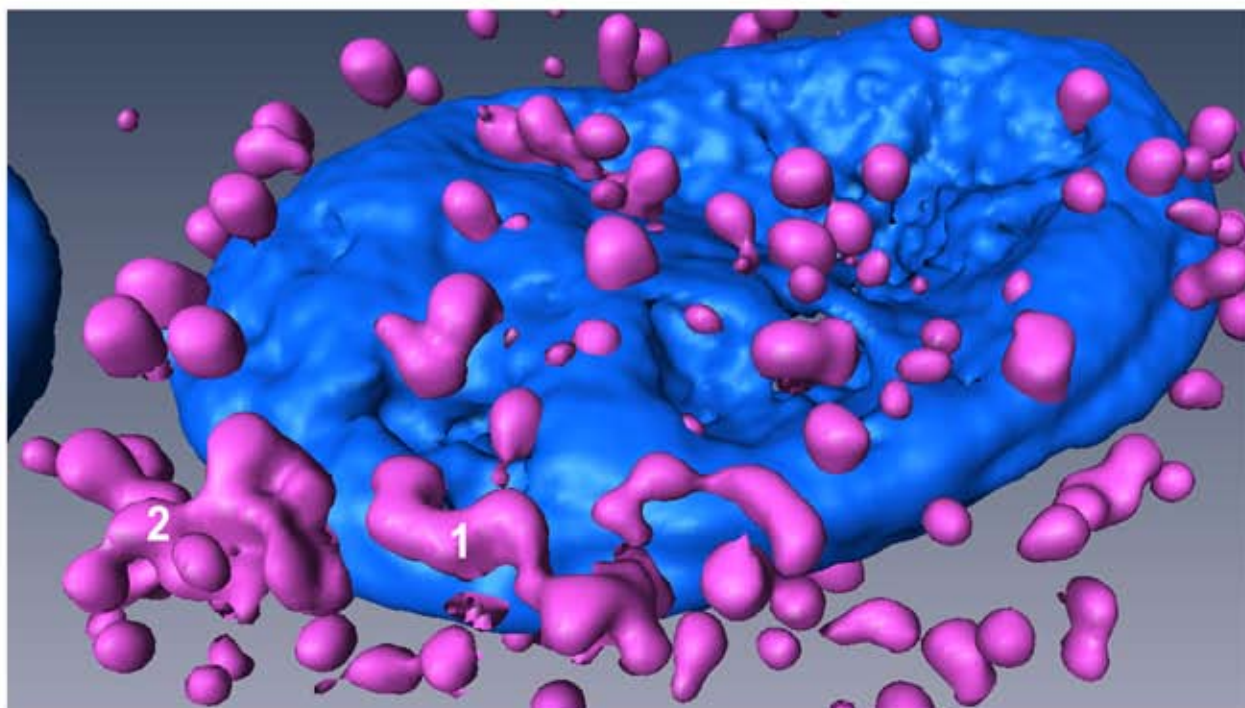



# Figure 3.

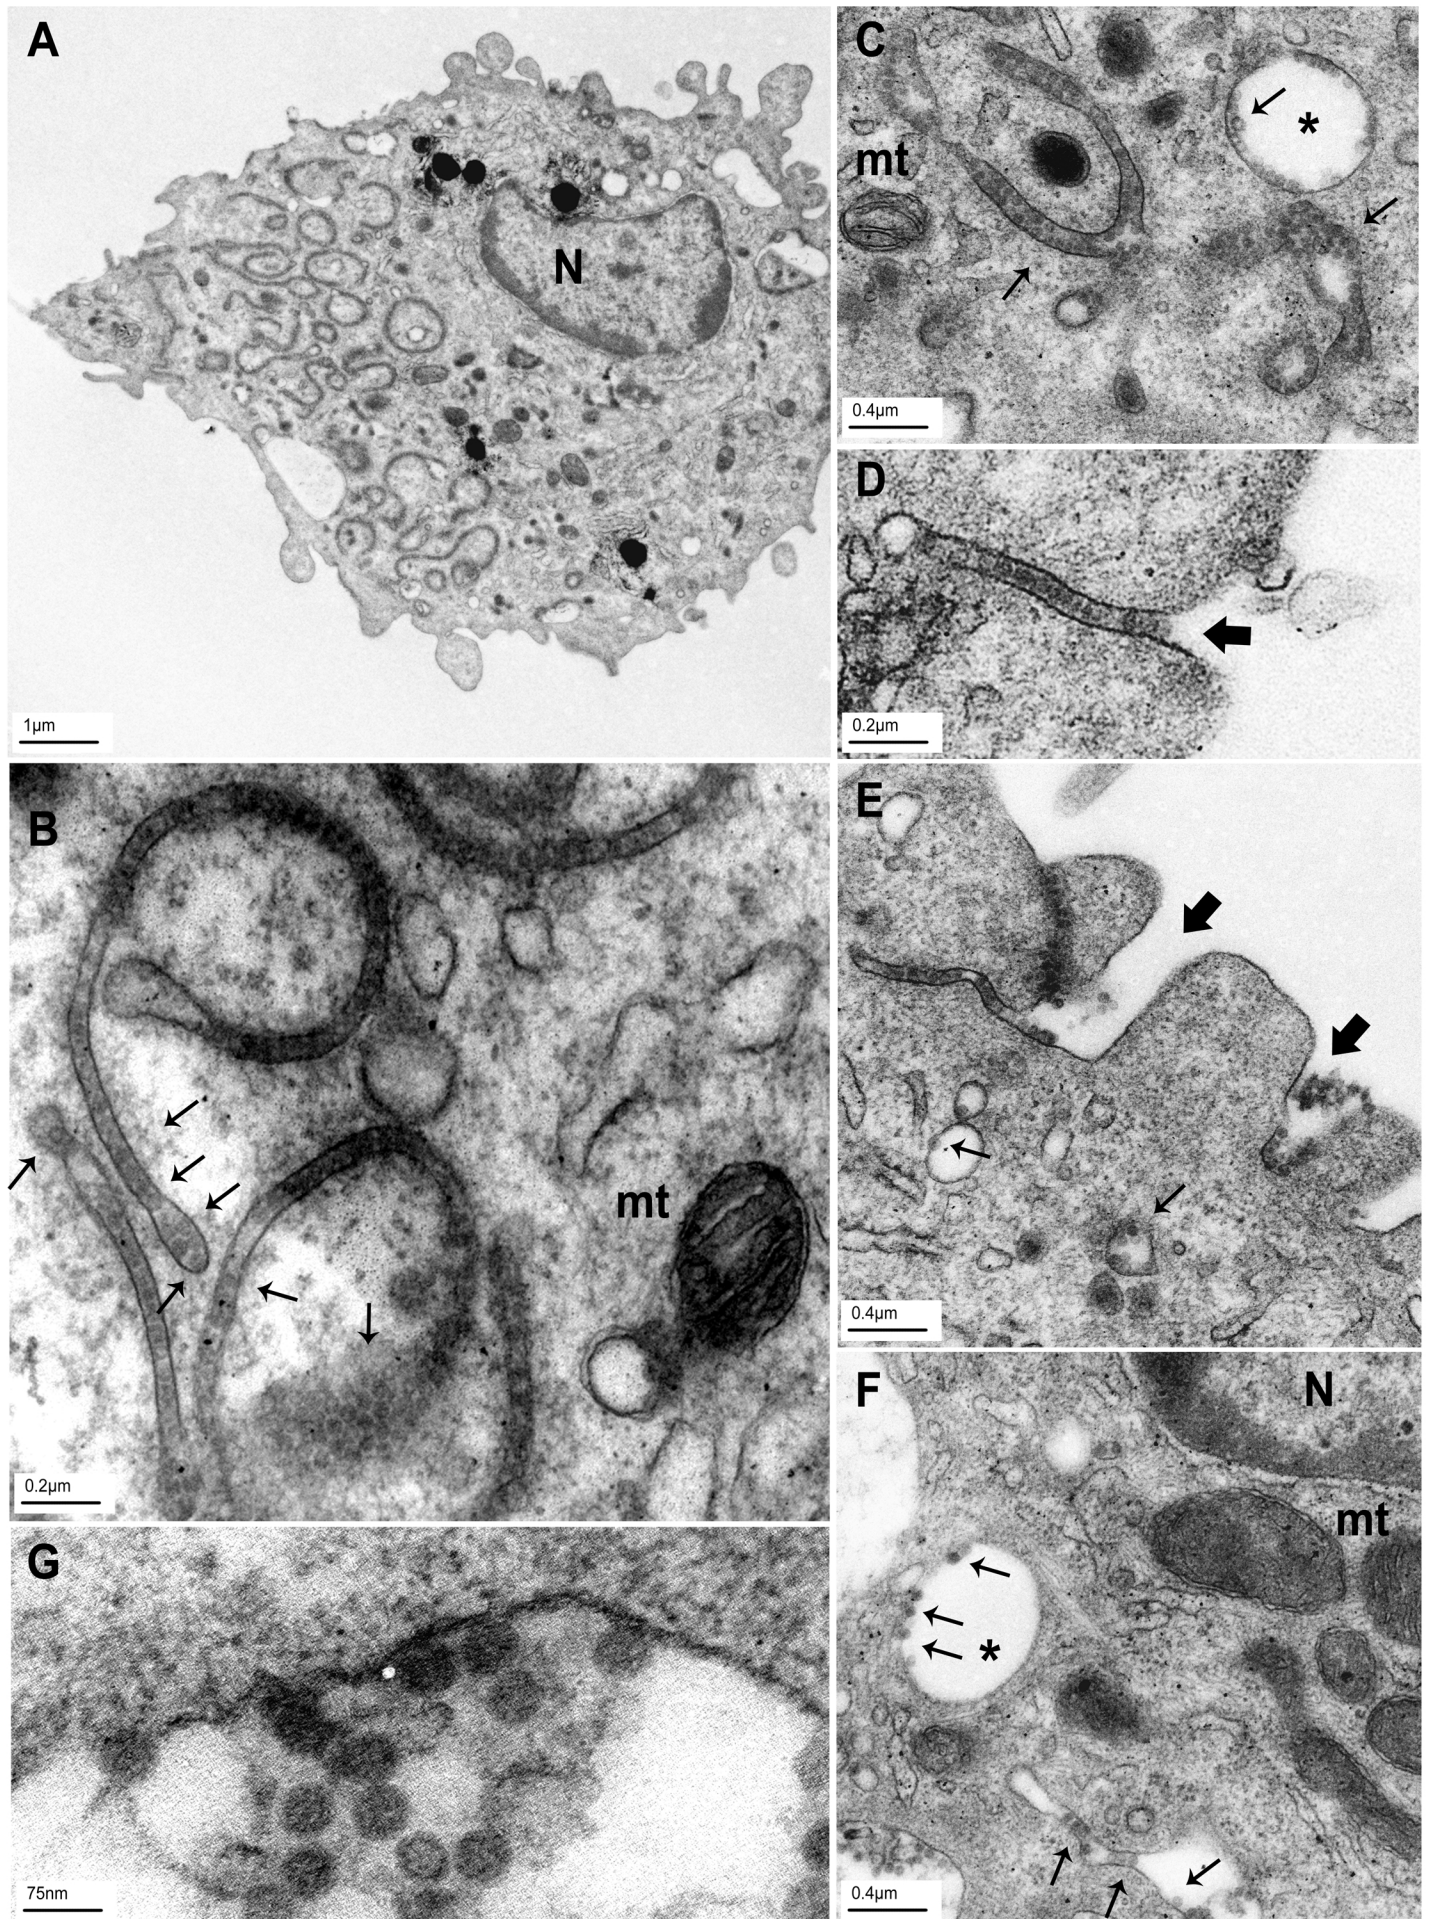

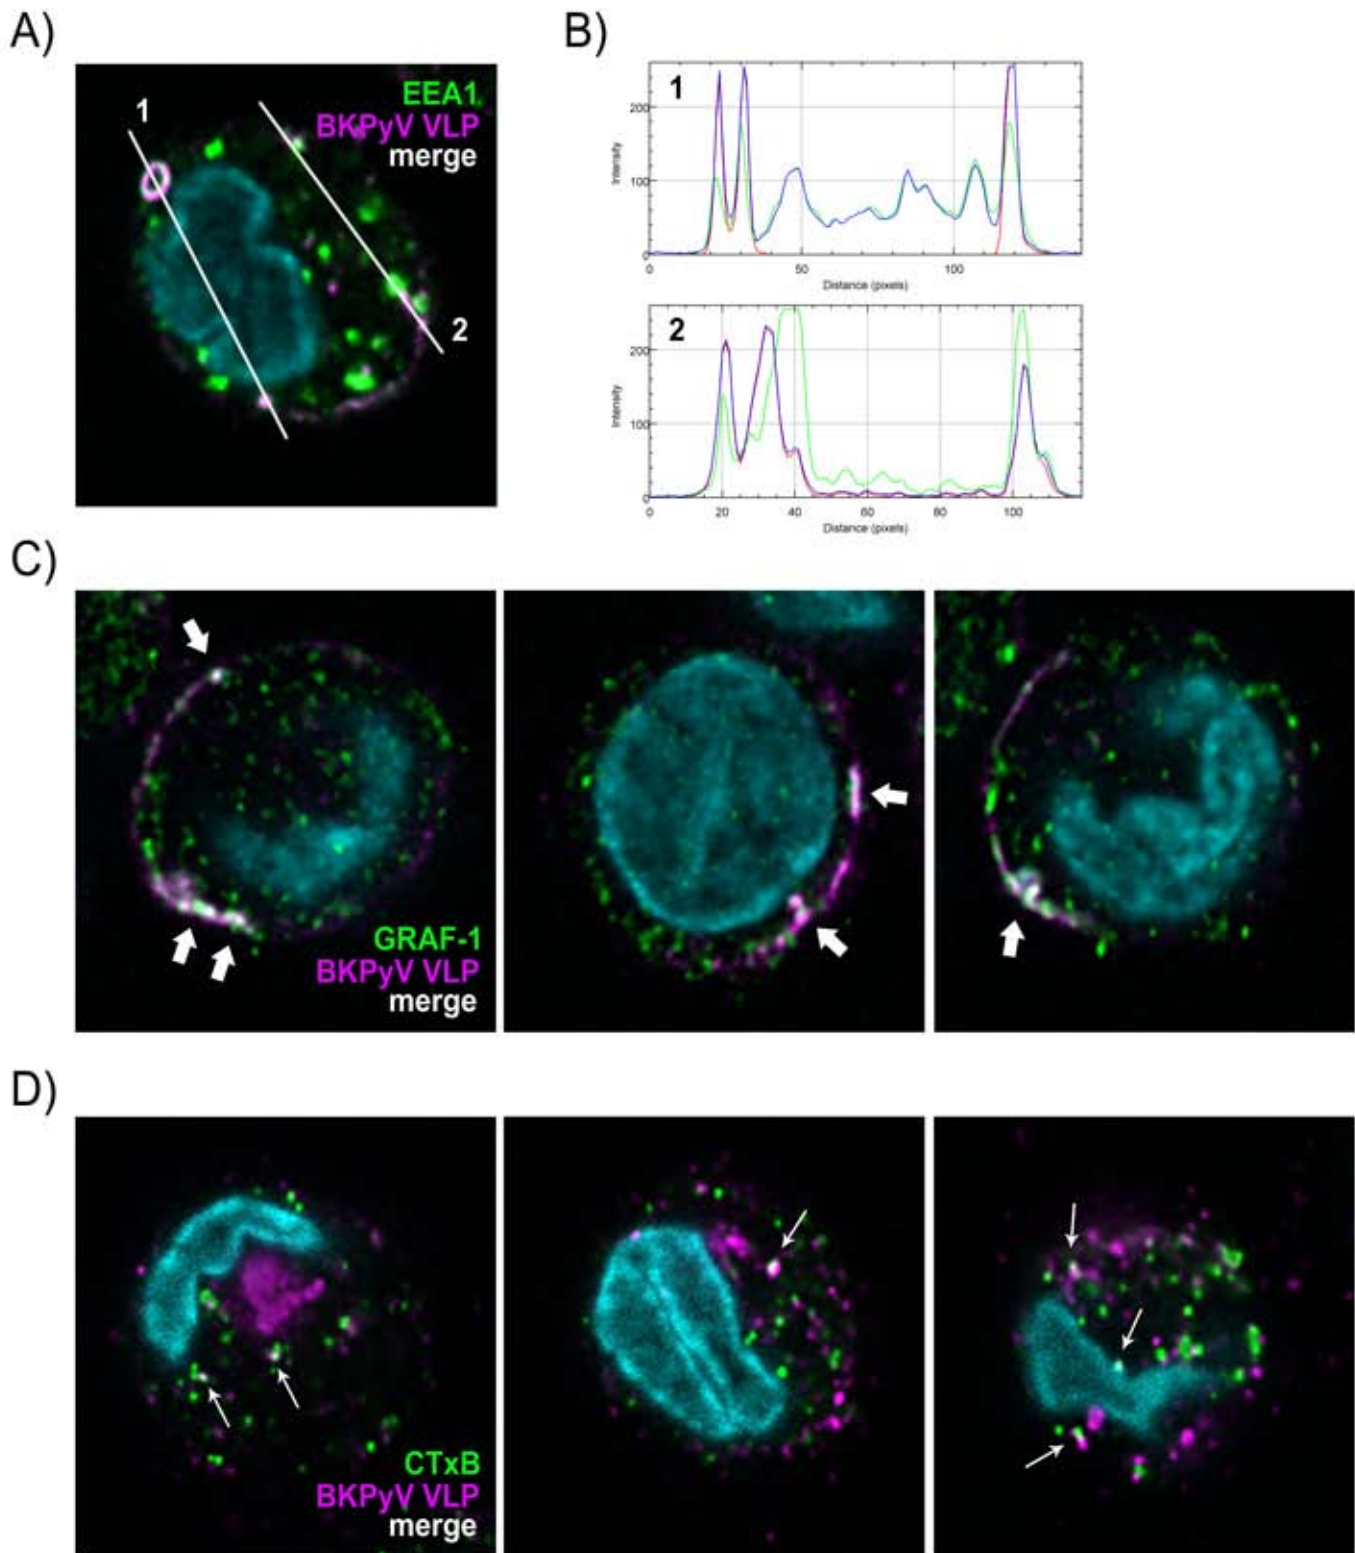

# Figure 5

A)

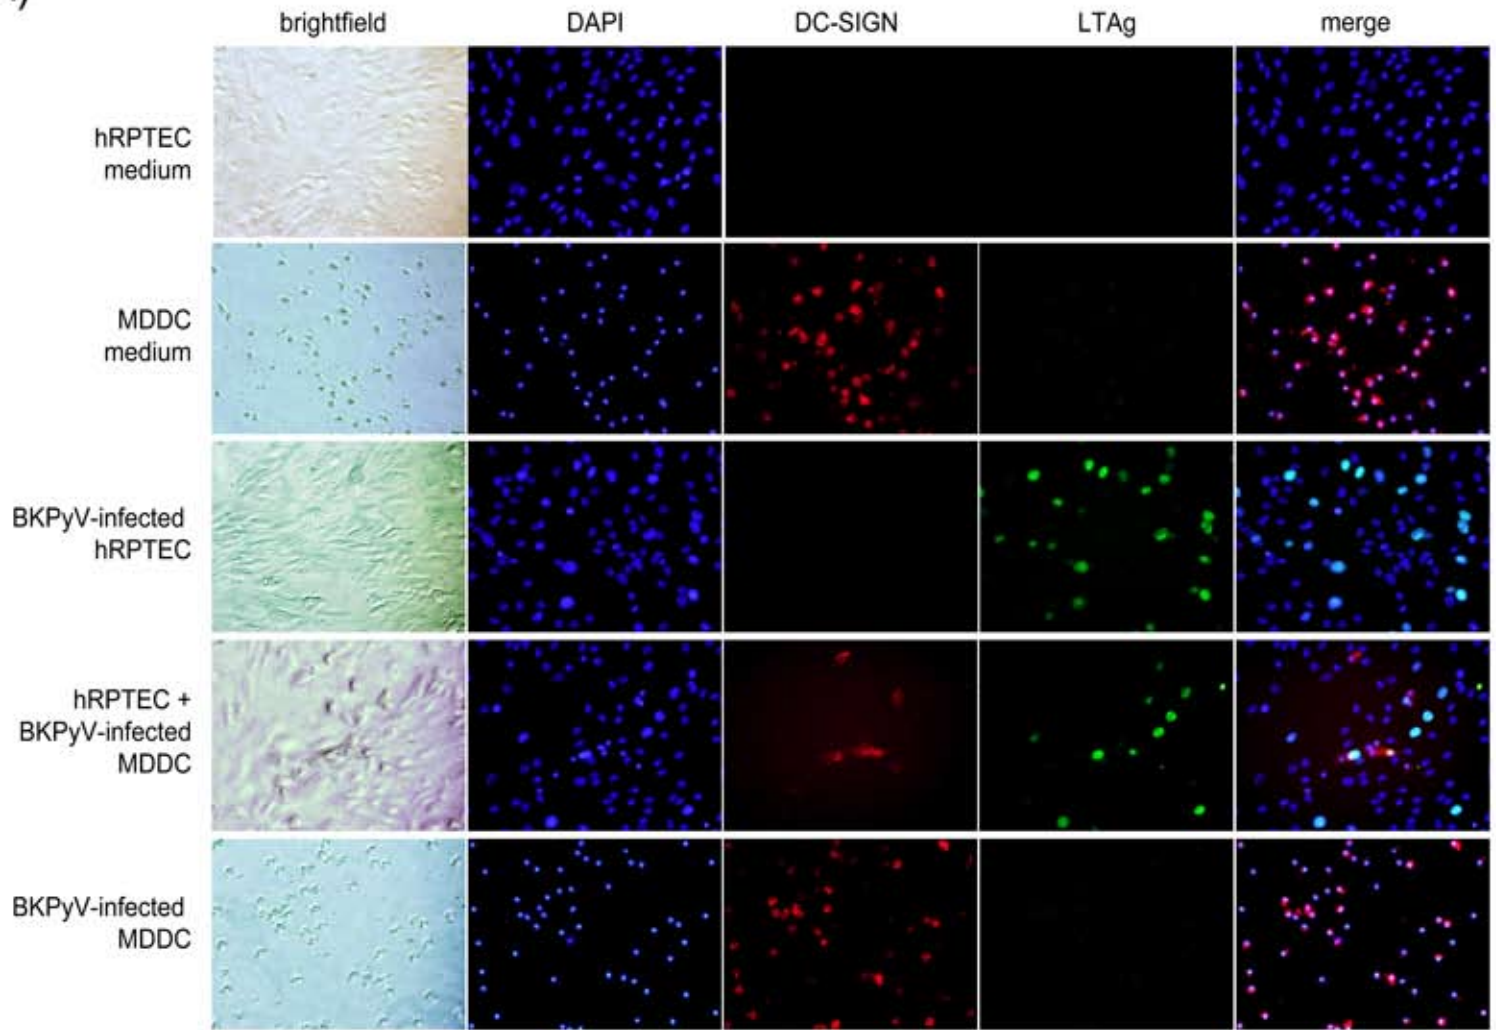

B)

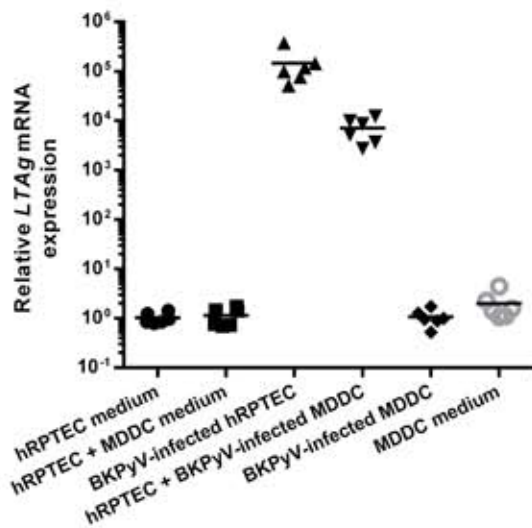

C)

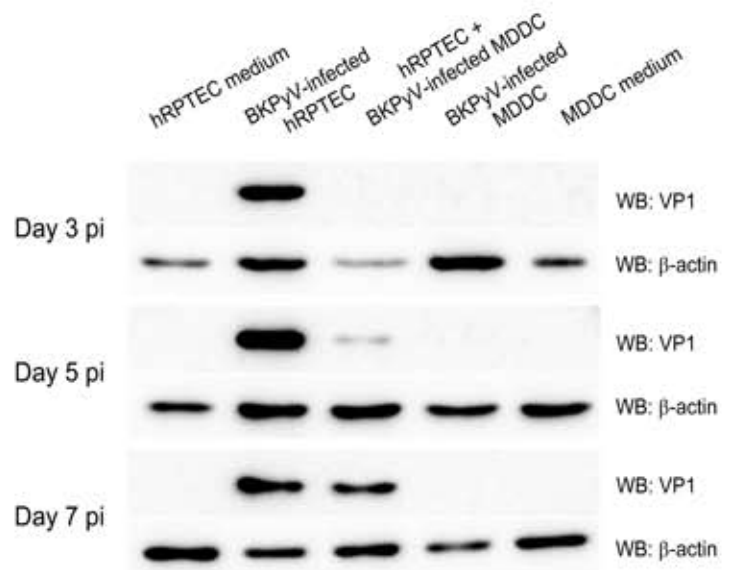

D)

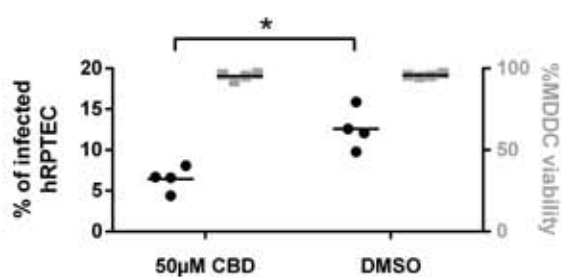

Figure 6:

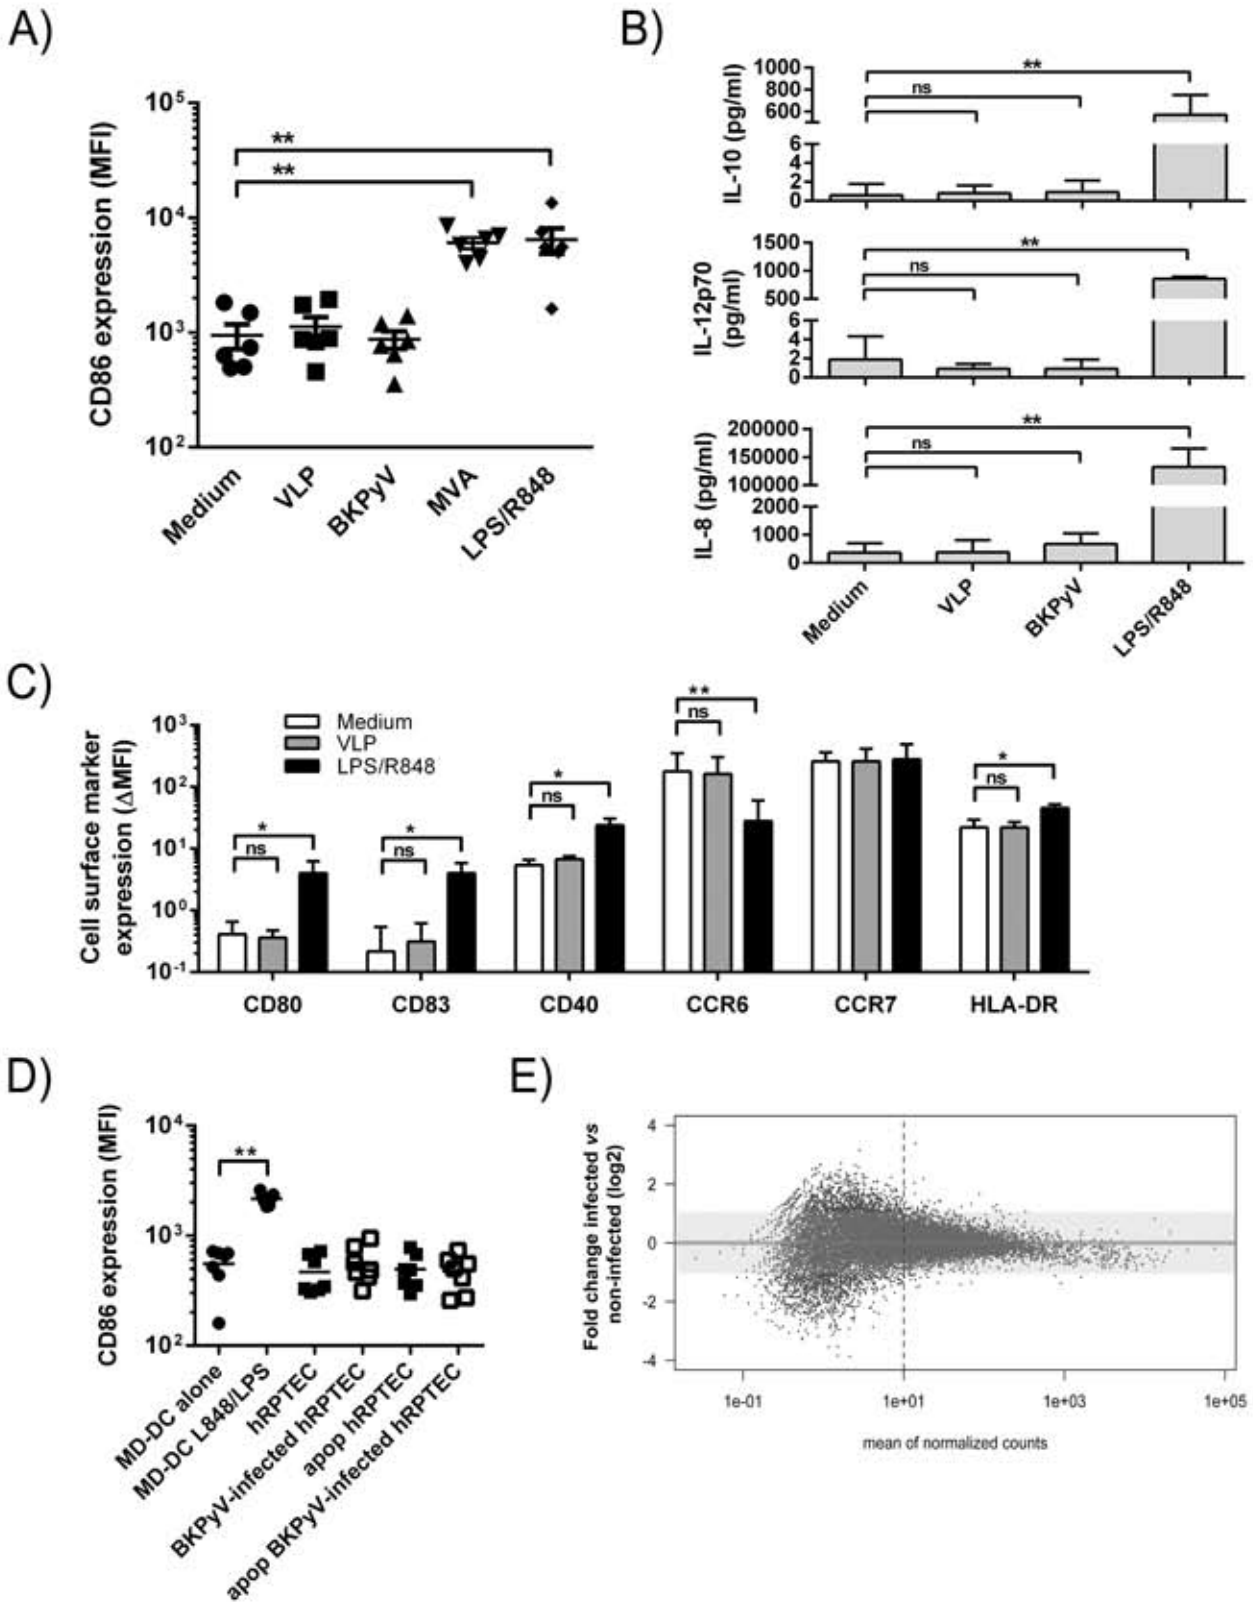

# Figure 7

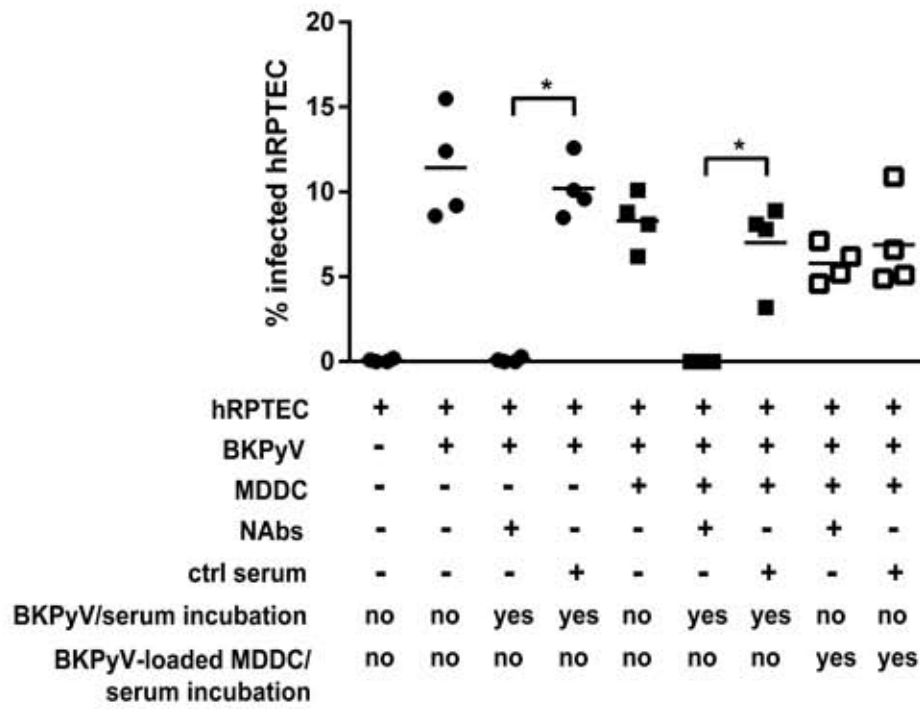

# Figure 8.

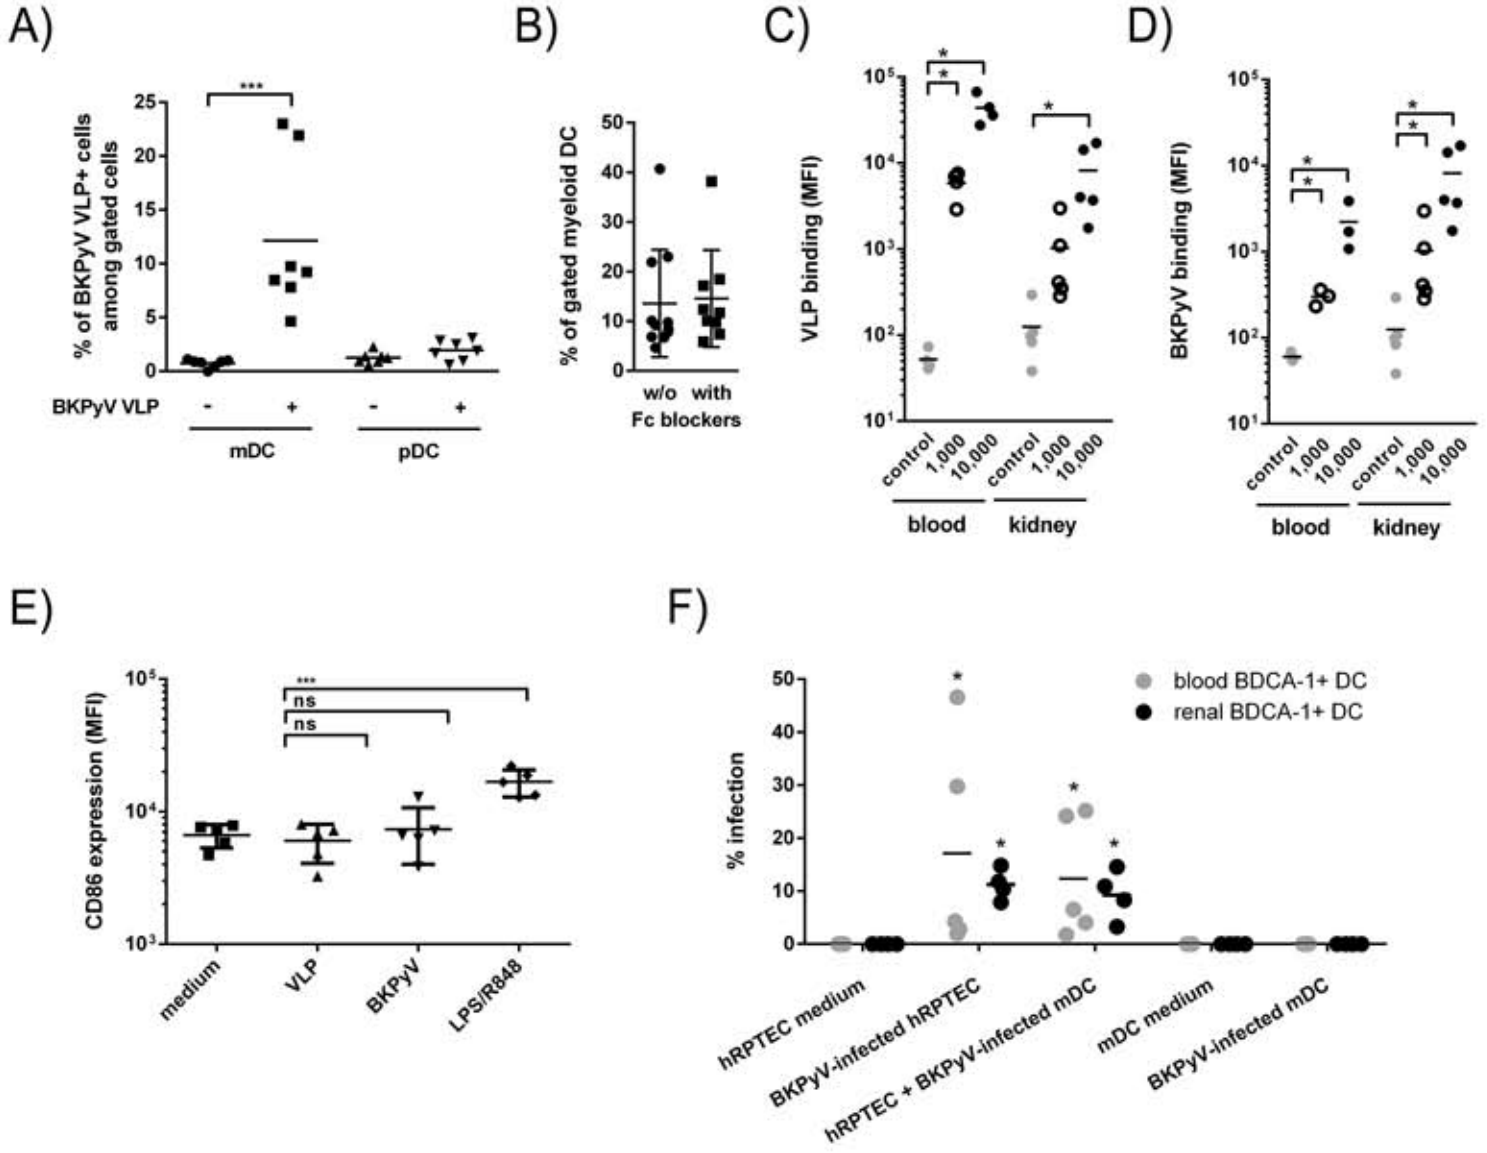

Source: https://www.biorxiv.org/content/10.1101/2020.09.04.282426v1.full.pdf
